# Supplementary material for: Single-cell RNA sequencing of t(8;21) acute myeloid leukemia for risk prediction
Source: PubMed Central journal article supplement — Oncol Rep. 2020 Feb 18;43(4):1278–88. doi: 10.3892/or.2020.7507 (PMC7057921; doi:10.3892/or.2020.7507), 2020-02-18
Supplement: Supplementary_Data2.pdf [file Supplementary_Data2.pdf]

Table SI. Reads numbers and distribution in subpopulations of 87 single cells.

| Patient A    |                       |        |       |
|--------------|-----------------------|--------|-------|
| Sample       | Number of total reads | hclust | SC3_6 |
| <b>A_C01</b> | 1,971,769             | A_2    | 2     |
| A_C02        | 1,905,631             | A_1    | 2     |
| A_C08        | 3,975,010             | A_3    | 2     |
| A_C17        | 999,409               | A_2    | 2     |
| <b>A_C19</b> | 2,079,535             | A_2    | 2     |
| A_C20        | 1,613,586             | A_2    | 2     |
| A_C23        | 713,516               | A_2    | 2     |
| A_C33        | 3,855,027             | A_3    | 2     |
| A_C34        | 2,636,599             | A_2    | 2     |
| A_C36        | 2,652,159             | A_2    | 2     |
| A_C39        | 7,062,363             | A_3    | 3     |
| A_C41        | 2,997,958             | A_3    | 3     |
| A_C45        | 6,127,585             | A_1    | 5     |
| A_C47        | 1,951,743             | A_3    | 3     |
| A_C49        | 1,032,959             | A_2    | 2     |
| A_C53        | 2,412,935             | A_3    | 3     |
| A_C54        | 2,150,113             | A_3    | 3     |
| A_C60        | 594,496               | A_1    | 3     |
| A_C62        | 9,318,027             | A_3    | 2     |
| A_C64        | 1,489,695             | A_3    | 3     |
| A_C65        | 2,623,800             | A_3    | 2     |
| A_C68        | 3,308,895             | A_3    | 3     |
| A_C71        | 3,269,891             | A_1    | 5     |
| A_C72        | 1,078,488             | A_3    | 3     |
| A_C73        | 4,478,018             | A_2    | 2     |
| A_C74        | 4,246,713             | A_3    | 3     |
| A_C76        | 1,029,397             | A_1    | 6     |
| A_C78        | 2,996,883             | A_1    | 3     |
| <b>A_C79</b> | 5,473,740             | A_2    | 2     |

|                  |                              |               |              |
|------------------|------------------------------|---------------|--------------|
| <b>A_C80</b>     | 3,723,682                    | A_3           | 2            |
| A_C82            | 1,267,995                    | A_3           | 3            |
| A_C84            | 1,981,342                    | A_2           | 2            |
| A_C88            | 6,338,400                    | A_1           | 5            |
| A_C89            | 897,799                      | A_2           | 2            |
| A_C91            | 2,207,894                    | A_2           | 2            |
| <b>A_C94</b>     | 19,357,086                   | A_3           | 3            |
| <b>Patient B</b> |                              |               |              |
| <b>Sample</b>    | <b>Number of total reads</b> | <b>hclust</b> | <b>SC3_6</b> |
| B_C01            | 2,090,234                    | B_2           | 1            |
| B_C02            | 1,882,742                    | B_2           | 4            |
| B_C03            | 2,263,031                    | B_3           | 1            |
| B_C05            | 902,407                      | B_1           | 6            |
| B_C06            | 1,135,409                    | B_1           | 6            |
| B_C07            | 2,497,735                    | B_3           | 1            |
| B_C08            | 1,187,482                    | B_2           | 4            |
| B_C12            | 1,669,824                    | B_1           | 6            |
| B_C13            | 1,257,297                    | B_1           | 6            |
| B_C15            | 2,384,761                    | B_3           | 1            |
| B_C16            | 441,317                      | B_2           | 4            |
| B_C18            | 1,685,691                    | B_3           | 1            |
| B_C20            | 896,662                      | B_1           | 6            |
| B_C21            | 705,517                      | B_1           | 6            |
| B_C23            | 1,078,505                    | B_3           | 1            |
| B_C25            | 1,489,131                    | B_2           | 4            |
| B_C27            | 1,099,153                    | B_1           | 6            |
| B_C28            | 427,629                      | B_2           | 6            |
| B_C32            | 1,012,354                    | B_1           | 6            |
| B_C34            | 468,431                      | B_2           | 6            |
| B_C35            | 569,704                      | B_3           | 1            |
| B_C37            | 2,008,726                    | B_3           | 1            |
| B_C41            | 1,119,150                    | B_3           | 1            |
| B_C42            | 538,073                      | B_1           | 6            |

|       |           |     |   |
|-------|-----------|-----|---|
| B_C43 | 2,093,641 | B_3 | 1 |
| B_C51 | 1,641,272 | B_2 | 4 |
| B_C55 | 1,781,742 | B_2 | 4 |
| B_C56 | 2,297,064 | B_3 | 1 |
| B_C57 | 1,696,145 | B_3 | 1 |
| B_C58 | 802,305   | B_3 | 1 |
| B_C59 | 1,223,408 | B_2 | 4 |
| B_C60 | 2,036,105 | B_1 | 6 |
| B_C63 | 1,460,961 | B_1 | 6 |
| B_C64 | 822,196   | B_2 | 4 |
| B_C65 | 1,307,928 | B_1 | 6 |
| B_C66 | 1,486,559 | B_3 | 1 |
| B_C68 | 1,453,090 | B_3 | 1 |
| B_C69 | 1,735,533 | B_3 | 1 |
| B_C70 | 1,831,674 | B_3 | 1 |
| B_C71 | 1,745,446 | B_2 | 1 |
| B_C79 | 1,893,941 | B_3 | 1 |
| B_C80 | 1,689,490 | B_2 | 4 |
| B_C81 | 1,689,315 | B_3 | 1 |
| B_C82 | 4,034,636 | B_3 | 1 |
| B_C83 | 1,657,379 | B_2 | 4 |
| B_C84 | 3,662,008 | B_3 | 1 |
| B_C85 | 2,130,066 | B_3 | 1 |
| B_C88 | 2,379,726 | B_2 | 4 |
| B_C90 | 3,641,407 | B_3 | 1 |
| B_C93 | 1,347,089 | B_2 | 4 |
| B_C96 | 2,564,034 | B_2 | 4 |

Cells in bold text are validated to be predicted fusion protein acute myeloid leukemia 1 protein-protein ETO positive by real-time PCR.
