# Supplementary material for: Single-cell RNA sequencing of t(8;21) acute myeloid leukemia for risk prediction
Source: PubMed Central journal article supplement — Oncol Rep. 2020 Feb 18;43(4):1278–88. doi: 10.3892/or.2020.7507 (PMC7057921; doi:10.3892/or.2020.7507), 2020-02-18
Supplement: Supplementary_Data3.pdf [file Supplementary_Data3.pdf]

Table SII. Differentially expressed genes of 87 single cells.

| gene_name      | sc3_6_markers_clusts | sc3_6_markers_padj       | sc3_6_markers_auroc | sc3_6_de_padj            |
|----------------|----------------------|--------------------------|---------------------|--------------------------|
| SHOX2          | 1                    | 0.000133674              | 0.864748677         | 3.34742x10 <sup>-7</sup> |
| HORMAD1        | 1                    | 4.06933x10 <sup>-8</sup> | 0.930886243         | 5.83734x10 <sup>-7</sup> |
| DNTT           | 1                    | 3.68538x10 <sup>-7</sup> | 0.905092593         | 1.66487x10 <sup>-5</sup> |
| MTND1P23       | 1                    | 0.000686208              | 0.860780423         | 1.86934x10 <sup>-5</sup> |
| XAGE1A         | 1                    | 6.87814x10 <sup>-6</sup> | 0.850859788         | 5.59476x10 <sup>-5</sup> |
| PCNA           | 1                    | 0.003229213              | 0.846230159         | 6.55443x10 <sup>-5</sup> |
| S100A16        | 1                    | 0.000470044              | 0.835648148         | 7.31715x10 <sup>-5</sup> |
| RP11-738E22.2  | 1                    | 3.2468x10 <sup>-5</sup>  | 0.874669312         | 0.000110537              |
| RP11-466H18.1  | 1                    | 0.011258925              | 0.841600529         | 0.000143949              |
| RAD51AP1       | 1                    | 0.504896512              | 0.766203704         | 0.000194829              |
| HLA-DRB4       | 1                    | 3.56086x10 <sup>-6</sup> | 0.847222222         | 0.000207227              |
| XAGE1C         | 1                    | 0.000111553              | 0.833333333         | 0.000245                 |
| XAGE1B         | 1                    | 0.00049977               | 0.832010582         | 0.00041849               |
| XAGE1D         | 1                    | 0.000160027              | 0.826058201         | 0.000773721              |
| AC002454.1     | 1                    | 3.05582x10 <sup>-5</sup> | 0.863756614         | 0.00085168               |
| PSME2          | 1                    | 0.000495063              | 0.881944444         | 0.000857836              |
| BRCA1          | 1                    | 1                        | 0.752645503         | 0.000907675              |
| IFITM3         | 1                    | 0.006921706              | 0.845568783         | 0.001150186              |
| MCM3           | 1                    | 1                        | 0.758928571         | 0.001448498              |
| NOP56          | 1                    | 0.03518637               | 0.827050265         | 0.002260082              |
| RP11-742N3.1   | 1                    | 0.013416297              | 0.840939153         | 0.002430729              |
| MYCBP2         | 1                    | 0.005177417              | 0.853505291         | 0.002469552              |
| MYB            | 1                    | 0.505639865              | 0.786375661         | 0.002731401              |
| RP11-386G11.10 | 1                    | 0.047088806              | 0.822751323         | 0.002748429              |
| RPL19          | 1                    | 0.458426404              | 0.786375661         | 0.002829261              |
| ESD            | 1                    | 1                        | 0.739417989         | 0.003873302              |
| PRPF38B        | 1                    | 1                        | 0.761574074         | 0.003881188              |
| RPS5           | 1                    | 1                        | 0.750330688         | 0.004206651              |
| USP1           | 1                    | 0.002393277              | 0.861441799         | 0.004927674              |
| BMP3           | 1                    | 0.004419563              | 0.836640212         | 0.005669745              |
| P2RX5          | 1                    | 0.060088814              | 0.807208995         | 0.00584059               |

|         |   |                          |             |                           |
|---------|---|--------------------------|-------------|---------------------------|
| MAD2L1  | 1 | 1                        | 0.74702381  | 0.005997152               |
| XAGE1E  | 1 | 7.55995x10 <sup>-5</sup> | 0.799603175 | 0.006683394               |
| PARP1   | 1 | 1                        | 0.768187831 | 0.006866802               |
| CLEC5A  | 1 | 0.007843178              | 0.809193122 | 0.00697861                |
| KLF10   | 1 | 0.000394299              | 0.859126984 | 0.007518969               |
| FABP5   | 1 | 0.363254581              | 0.788690476 | 0.009123702               |
| POMP    | 1 | 1                        | 0.740740741 | 0.009632056               |
| EBF3    | 1 | 0.000818001              | 0.809854497 | 0.009788884               |
| OAT     | 1 | 1                        | 0.739417989 | 0.010144358               |
| GMNN    | 1 | 0.1551815                | 0.787698413 | 0.011005834               |
| TMEM48  | 1 | 0.032944576              | 0.812169312 | 0.011051411               |
| UBB     | 1 | 0.941060461              | 0.775462963 | 0.012009927               |
| HIF0    | 1 | 0.102161598              | 0.767195767 | 0.013533041               |
| SGOL1   | 1 | 0.512110875              | 0.768518519 | 0.014985009               |
| SYNCRIP | 1 | 1                        | 0.707010582 | 0.016521987               |
| PPIP5K2 | 1 | 1                        | 0.706679894 | 0.017685207               |
| IFI16   | 1 | 0.62045741               | 0.782738095 | 0.020270364               |
| MLL     | 1 | 1                        | 0.721230159 | 0.020759618               |
| LDHB    | 1 | 1                        | 0.748015873 | 0.021250991               |
| TCF4    | 1 | 0.00575771               | 0.845899471 | 0.021492543               |
| RPL41P1 | 1 | 0.002331386              | 0.832671958 | 0.023802692               |
| NHP2L1  | 1 | 1                        | 0.719246032 | 0.026141971               |
| TCP1    | 1 | 1                        | 0.716600529 | 0.02864764                |
| NRIP1   | 1 | 1                        | 0.772156085 | 0.029257955               |
| HSPD1   | 1 | 0.036139703              | 0.827050265 | 0.029335124               |
| NUFIP2  | 1 | 1                        | 0.694444444 | 0.033795561               |
| MCM5    | 1 | 0.032795174              | 0.80952381  | 0.035174399               |
| PA2G4   | 1 | 0.266021616              | 0.796296296 | 0.041812851               |
| RPL26   | 1 | 1                        | 0.701719577 | 0.042678346               |
| MYL12A  | 1 | 1                        | 0.744047619 | 0.044112061               |
| CCND1   | 1 | 0.004523911              | 0.791666667 | 0.044587084               |
| DDX18   | 1 | 1                        | 0.712962963 | 0.046388283               |
| HLA-DRA | 2 | 3.14048x10 <sup>-5</sup> | 0.908668731 | 5.77219x10 <sup>-10</sup> |
| EREG    | 2 | 0.001836083              | 0.887770898 | 8.00456x10 <sup>-9</sup>  |

|               |   |                          |             |                          |
|---------------|---|--------------------------|-------------|--------------------------|
| TAPBP         | 2 | 9.71159x10 <sup>-5</sup> | 0.895897833 | 2.01357x10 <sup>-8</sup> |
| ATP8B4        | 2 | 4.47148x10 <sup>-7</sup> | 0.936532508 | 2.6062x10 <sup>-8</sup>  |
| RP11-704M14.1 | 2 | 2.15277x10 <sup>-5</sup> | 0.88622291  | 2.63727x10 <sup>-8</sup> |
| RP11-527N22.1 | 2 | 0.001852696              | 0.876160991 | 8.67071x10 <sup>-8</sup> |
| HLA-DRB5      | 2 | 2.07106x10 <sup>-5</sup> | 0.886609907 | 1.13392x10 <sup>-7</sup> |
| ATP2B1        | 2 | 0.001344838              | 0.890866873 | 1.72663x10 <sup>-7</sup> |
| SIPA1L1       | 2 | 0.001303857              | 0.888931889 | 1.77615x10 <sup>-7</sup> |
| MYO1G         | 2 | 0.000490503              | 0.891640867 | 3.25861x10 <sup>-7</sup> |
| CLECL1        | 2 | 0.000100056              | 0.866099071 | 4.70792x10 <sup>-7</sup> |
| PDCD6IP       | 2 | 0.121544274              | 0.833204334 | 6.18422x10 <sup>-7</sup> |
| SUCNR1        | 2 | 7.68015x10 <sup>-9</sup> | 0.900928793 | 6.73565x10 <sup>-7</sup> |
| ADAM28        | 2 | 0.005025509              | 0.857585139 | 9.7551x10 <sup>-7</sup>  |
| PBX3          | 2 | 0.000827945              | 0.835139319 | 1.25209x10 <sup>-6</sup> |
| FAM92A1       | 2 | 5.71267x10 <sup>-5</sup> | 0.905959752 | 1.37439x10 <sup>-6</sup> |
| SOCS2         | 2 | 1.11035x10 <sup>-5</sup> | 0.938080495 | 1.42334x10 <sup>-6</sup> |
| VENTX         | 2 | 0.007937512              | 0.866486068 | 2.29875x10 <sup>-6</sup> |
| TPPP3         | 2 | 1.41324x10 <sup>-6</sup> | 0.894736842 | 2.66469x10 <sup>-6</sup> |
| WDR67         | 2 | 0.000109515              | 0.927631579 | 2.77029x10 <sup>-6</sup> |
| SVIL          | 2 | 0.019032423              | 0.847136223 | 3.108x10 <sup>-6</sup>   |
| ARRDC3        | 2 | 0.047375944              | 0.848297214 | 3.26872x10 <sup>-6</sup> |
| PDZD8         | 2 | 0.007646419              | 0.868421053 | 3.60429x10 <sup>-6</sup> |
| MTSS1         | 2 | 0.00075336               | 0.902089783 | 3.76406x10 <sup>-6</sup> |
| RDX           | 2 | 0.001190099              | 0.900541796 | 4.49749x10 <sup>-6</sup> |
| AHNAK         | 2 | 0.036635472              | 0.851393189 | 6.33761x10 <sup>-6</sup> |
| ARNT          | 2 | 0.012921001              | 0.867647059 | 6.43768x10 <sup>-6</sup> |
| ZNF572        | 2 | 2.94437x10 <sup>-7</sup> | 0.872291022 | 6.54319x10 <sup>-6</sup> |
| FLNA          | 2 | 0.004222279              | 0.841718266 | 6.7786x10 <sup>-6</sup>  |
| RP1-5O6.4     | 2 | 1.67249x10 <sup>-8</sup> | 0.887383901 | 7.18819x10 <sup>-6</sup> |
| RP5-1022P6.3  | 2 | 6.0614x10 <sup>-7</sup>  | 0.897058824 | 7.30938x10 <sup>-6</sup> |
| GNPTAB        | 2 | 0.040667669              | 0.851780186 | 8.20872x10 <sup>-6</sup> |
| MMP19         | 2 | 0.000116244              | 0.868421053 | 1.15123x10 <sup>-5</sup> |
| OSBPL3        | 2 | 0.017301951              | 0.852167183 | 1.17833x10 <sup>-5</sup> |
| EDEM1         | 2 | 0.152150146              | 0.829721362 | 1.45641x10 <sup>-5</sup> |
| DLC1          | 2 | 3.23809x10 <sup>-6</sup> | 0.876547988 | 1.46948x10 <sup>-5</sup> |

|            |   |                          |             |                          |
|------------|---|--------------------------|-------------|--------------------------|
| NUP153     | 2 | 0.096589316              | 0.834752322 | 1.68425x10 <sup>-5</sup> |
| TYMS       | 2 | 0.749770522              | 0.796826625 | 1.68694x10 <sup>-5</sup> |
| RGPD5      | 2 | 0.035721728              | 0.85371517  | 1.79739x10 <sup>-5</sup> |
| DMD        | 2 | 0.003335311              | 0.882739938 | 1.90399x10 <sup>-5</sup> |
| ZNF716     | 2 | 0.011908429              | 0.854489164 | 1.9759x10 <sup>-5</sup>  |
| PIM1       | 2 | 3.51893x10 <sup>-5</sup> | 0.921439628 | 2.1219x10 <sup>-5</sup>  |
| ITSN1      | 2 | 0.002960254              | 0.886609907 | 2.28098x10 <sup>-5</sup> |
| HAVCR2     | 2 | 0.260219733              | 0.816176471 | 2.31276x10 <sup>-5</sup> |
| HIF1A      | 2 | 0.628613462              | 0.806114551 | 2.44701x10 <sup>-5</sup> |
| FAM105B    | 2 | 0.018290078              | 0.84752322  | 2.83001x10 <sup>-5</sup> |
| SFXN1      | 2 | 0.036210024              | 0.851780186 | 3.0529x10 <sup>-5</sup>  |
| TRPS1      | 2 | 0.000379914              | 0.871517028 | 3.39555x10 <sup>-5</sup> |
| INPP5B     | 2 | 0.34444711               | 0.816563467 | 3.6079x10 <sup>-5</sup>  |
| CACUL1     | 2 | 0.051014598              | 0.847910217 | 3.64653x10 <sup>-5</sup> |
| MBNL2      | 2 | 0.000377792              | 0.90247678  | 4.32347x10 <sup>-5</sup> |
| NCAPG      | 2 | 0.119615495              | 0.825464396 | 4.51112x10 <sup>-5</sup> |
| RNF10      | 2 | 0.254950391              | 0.820433437 | 4.62606x10 <sup>-5</sup> |
| TMEM248    | 2 | 0.148499791              | 0.825077399 | 4.86285x10 <sup>-5</sup> |
| CASC5      | 2 | 0.082748839              | 0.838622291 | 5.41389x10 <sup>-5</sup> |
| ZNF37BP    | 2 | 0.007362077              | 0.871517028 | 5.81097x10 <sup>-5</sup> |
| EBP        | 2 | 4.51836x10 <sup>-5</sup> | 0.901702786 | 6.03865x10 <sup>-5</sup> |
| LONRF1     | 2 | 0.00038341               | 0.862229102 | 6.1695x10 <sup>-5</sup>  |
| ARID2      | 2 | 0.629273414              | 0.805727554 | 6.22153x10 <sup>-5</sup> |
| RNF219-AS1 | 2 | 2.04993x10 <sup>-7</sup> | 0.835139319 | 6.56284x10 <sup>-5</sup> |
| SMC2       | 2 | 1                        | 0.772832817 | 6.84729x10 <sup>-5</sup> |
| THAP5      | 2 | 0.008709518              | 0.875       | 7.25939x10 <sup>-5</sup> |
| CNOT2      | 2 | 0.10124001               | 0.8374613   | 7.32781x10 <sup>-5</sup> |
| ACSM1      | 2 | 0.003569627              | 0.835913313 | 7.44355x10 <sup>-5</sup> |
| ATG14      | 2 | 0.276020504              | 0.820433437 | 7.65976x10 <sup>-5</sup> |
| MGEA5      | 2 | 0.977421295              | 0.797987616 | 7.81056x10 <sup>-5</sup> |
| RIF1       | 2 | 0.666535582              | 0.80495356  | 8.30036x10 <sup>-5</sup> |
| UGT2B11    | 2 | 0.001521328              | 0.828173375 | 8.54603x10 <sup>-5</sup> |
| RWDD2B     | 2 | 0.067567479              | 0.834365325 | 8.72467x10 <sup>-5</sup> |
| SRGN       | 2 | 0.043566012              | 0.850232198 | 9.46942x10 <sup>-5</sup> |

|                 |   |                          |             |             |
|-----------------|---|--------------------------|-------------|-------------|
| GRAMD3          | 2 | 0.118002442              | 0.829334365 | 0.000100317 |
| MREG            | 2 | 4.09547x10 <sup>-7</sup> | 0.811145511 | 0.000103168 |
| POLR2J4         | 2 | 1                        | 0.75619195  | 0.000103788 |
| CBFB            | 2 | 0.029948316              | 0.847136223 | 0.000104776 |
| ENSG00000237779 | 2 | 0.000736171              | 0.860681115 | 0.000107752 |
| HDC             | 2 | 0.000182848              | 0.827399381 | 0.000111598 |
| STT3A           | 2 | 0.699618731              | 0.80379257  | 0.000112029 |
| NCAPG2          | 2 | 0.704417974              | 0.799922601 | 0.000125334 |
| AGTPBP1         | 2 | 0.053622587              | 0.838235294 | 0.000125741 |
| WIPI2           | 2 | 0.357329892              | 0.81501548  | 0.000127135 |
| PHF11           | 2 | 0.004694816              | 0.876547988 | 0.000135575 |
| AQR             | 2 | 0.037669398              | 0.849071207 | 0.000138572 |
| TBK1            | 2 | 0.024692465              | 0.835913313 | 0.000149332 |
| ANLN            | 2 | 0.015022669              | 0.857198142 | 0.000154246 |
| CHP1            | 2 | 0.011907299              | 0.870356037 | 0.000156771 |
| FNIP1           | 2 | 0.168121369              | 0.828560372 | 0.000159459 |
| TLN1            | 2 | 0.236603072              | 0.821981424 | 0.000162197 |
| DYNC1H1         | 2 | 0.416361674              | 0.812693498 | 0.000163177 |
| RP11-576C12.1   | 2 | 4.78596x10 <sup>-7</sup> | 0.845975232 | 0.00016704  |
| TMEM154         | 2 | 0.277117783              | 0.82004644  | 0.000171942 |
| PTTG1IP         | 2 | 0.145798909              | 0.821594427 | 0.000175793 |
| HLA-E           | 2 | 0.056999791              | 0.828173375 | 0.00017683  |
| SAAL1           | 2 | 5.05951x10 <sup>-5</sup> | 0.888157895 | 0.000184318 |
| TTC19           | 2 | 0.074372396              | 0.841718266 | 0.000186941 |
| C7orf57         | 2 | 6.47719x10 <sup>-7</sup> | 0.843653251 | 0.00018717  |
| GIGYF2          | 2 | 0.441130187              | 0.812306502 | 0.000194687 |
| CTB-89H12.4     | 2 | 0.213180382              | 0.824690402 | 0.000205161 |
| RC3H1           | 2 | 0.019948669              | 0.861842105 | 0.000211309 |
| HBS1L           | 2 | 0.337938574              | 0.81501548  | 0.00021244  |
| NLN             | 2 | 0.063505368              | 0.841331269 | 0.000238831 |
| EPHA3           | 2 | 0.000431539              | 0.85371517  | 0.000242759 |
| NFIB            | 2 | 1.51518x10 <sup>-6</sup> | 0.820433437 | 0.000243473 |
| SPIRE1          | 2 | 1.05505x10 <sup>-5</sup> | 0.835526316 | 0.000248869 |
| UCP2            | 2 | 0.301209949              | 0.815789474 | 0.000254797 |

|           |   |                          |             |             |
|-----------|---|--------------------------|-------------|-------------|
| PLIN2     | 2 | 0.020128635              | 0.861068111 | 0.00025887  |
| XRCC6     | 2 | 1                        | 0.780185759 | 0.000261246 |
| RHOC      | 2 | 0.001895729              | 0.839783282 | 0.000262034 |
| SDHD      | 2 | 1                        | 0.790247678 | 0.000267523 |
| NF2       | 2 | 0.010155671              | 0.871130031 | 0.000270738 |
| DNMBP-AS1 | 2 | 0.304852968              | 0.80998452  | 0.000271599 |
| SNRPA1    | 2 | 1                        | 0.759287926 | 0.00028288  |
| PCCA      | 2 | 0.149555168              | 0.814628483 | 0.000287116 |
| SLC35A3   | 2 | 0.273694692              | 0.818885449 | 0.000287465 |
| FAM129A   | 2 | 0.013203062              | 0.866486068 | 0.000299829 |
| C2orf68   | 2 | 0.130604549              | 0.832043344 | 0.00030763  |
| SRI       | 2 | 0.078097416              | 0.830495356 | 0.000312675 |
| C3orf70   | 2 | 0.012998018              | 0.85874613  | 0.000339207 |
| CLASP1    | 2 | 0.526172332              | 0.808823529 | 0.000340565 |
| NAA15     | 2 | 1                        | 0.777863777 | 0.000362362 |
| CBLB      | 2 | 0.082499997              | 0.836687307 | 0.000372183 |
| ATAD2     | 2 | 0.67658097               | 0.804179567 | 0.000375982 |
| RICTOR    | 2 | 0.068061241              | 0.843653251 | 0.000386235 |
| TMOD3     | 2 | 0.083577292              | 0.837074303 | 0.000390887 |
| PGD       | 2 | 0.030336841              | 0.848684211 | 0.000408598 |
| UBE2H     | 2 | 0.001012203              | 0.883513932 | 0.000411083 |
| MYSM1     | 2 | 0.004810254              | 0.876934985 | 0.000413772 |
| DNAJC9    | 2 | 0.000698108              | 0.892027864 | 0.000420205 |
| ZDHHC17   | 2 | 0.005839931              | 0.867647059 | 0.000443931 |
| UBXN4     | 2 | 1                        | 0.747291022 | 0.00047448  |
| KCTD15    | 2 | $9.84559 \times 10^{-7}$ | 0.823529412 | 0.000486434 |
| LRPAP1    | 2 | 0.368025801              | 0.813467492 | 0.000499716 |
| RNF144A   | 2 | 0.036026562              | 0.839783282 | 0.00050254  |
| DMXL2     | 2 | 0.001549523              | 0.890479876 | 0.000505595 |
| CD55      | 2 | 0.533762628              | 0.808049536 | 0.000513272 |
| UBE2A     | 2 | 0.083086558              | 0.830495356 | 0.000527768 |
| CEP85L    | 2 | 0.038299483              | 0.799535604 | 0.000531885 |
| CYBA      | 2 | 0.102505211              | 0.828560372 | 0.000532553 |
| ZNF131    | 2 | 1                        | 0.784829721 | 0.00054033  |

|            |   |                          |             |             |
|------------|---|--------------------------|-------------|-------------|
| UIMC1      | 2 | 0.272256308              | 0.819659443 | 0.000541608 |
| CD38       | 2 | 0.025291411              | 0.851393189 | 0.000543367 |
| TTF2       | 2 | 0.279000593              | 0.82004644  | 0.000546063 |
| AC068491.1 | 2 | 0.514822893              | 0.79876161  | 0.000547821 |
| ZNF738     | 2 | 0.004842355              | 0.86493808  | 0.000561398 |
| DCTN4      | 2 | 0.329531281              | 0.805340557 | 0.00056433  |
| ZBTB16     | 2 | 0.129939471              | 0.825851393 | 0.00057675  |
| ITPR2      | 2 | 0.035392126              | 0.85255418  | 0.000582944 |
| ZKSCAN5    | 2 | 0.005731927              | 0.871904025 | 0.000600279 |
| LINC00574  | 2 | 0.297991693              | 0.792956656 | 0.000602419 |
| STX2       | 2 | 0.13148143               | 0.825464396 | 0.000604758 |
| SLC30A7    | 2 | 0.067988691              | 0.842879257 | 0.000606279 |
| VT11A      | 2 | 0.417098095              | 0.812693498 | 0.000635032 |
| TRIO       | 2 | 0.242252369              | 0.821594427 | 0.000643553 |
| BIRC5      | 2 | 0.005632939              | 0.864164087 | 0.000656597 |
| KNTC1      | 2 | 1                        | 0.767027864 | 0.000660814 |
| H2AFV      | 2 | 1                        | 0.786764706 | 0.000677906 |
| ZFC3H1     | 2 | 0.183240512              | 0.825851393 | 0.000694858 |
| BRD8       | 2 | 1                        | 0.78250774  | 0.000700634 |
| CWF19L1    | 2 | 0.1525695                | 0.828947368 | 0.000739077 |
| IFNGR2     | 2 | 0.000175717              | 0.898219814 | 0.000763327 |
| TNFAIP3    | 2 | 0.001349246              | 0.825464396 | 0.000773025 |
| INPP5F     | 2 | 1                        | 0.781346749 | 0.000777826 |
| IKZF2      | 2 | $2.37938 \times 10^{-5}$ | 0.88506192  | 0.000806212 |
| MYBL2      | 2 | 0.017172189              | 0.82120743  | 0.000808982 |
| SNX14      | 2 | 0.217400393              | 0.824303406 | 0.000837443 |
| CKB        | 2 | 0.000120762              | 0.846749226 | 0.000856176 |
| NAPB       | 2 | 0.025270242              | 0.851780186 | 0.000857047 |
| ARFGAP2    | 2 | 0.116109193              | 0.830882353 | 0.000859944 |
| SNRPC      | 2 | 0.191642495              | 0.822368421 | 0.000882715 |
| GCSAML     | 2 | 0.015254192              | 0.857972136 | 0.000903869 |
| SPTLC1     | 2 | 0.255065758              | 0.818885449 | 0.000914873 |
| TMEM165    | 2 | 0.110063188              | 0.835139319 | 0.000940526 |
| CRYZ       | 2 | $3.39951 \times 10^{-6}$ | 0.864551084 | 0.000952054 |

|               |   |                          |             |             |
|---------------|---|--------------------------|-------------|-------------|
| SLFN13        | 2 | 0.003516305              | 0.867260062 | 0.000952054 |
| IL2RG         | 2 | 0.03561212               | 0.851393189 | 0.000953444 |
| RP11-513G19.1 | 2 | 1.36085x10 <sup>-5</sup> | 0.877708978 | 0.000966429 |
| TMEM44        | 2 | 0.049585329              | 0.826625387 | 0.000970423 |
| SNHG12        | 2 | 0.395089443              | 0.813080495 | 0.000981703 |
| DENND4A       | 2 | 0.00059542               | 0.866486068 | 0.000986066 |
| MORF4L2       | 2 | 1                        | 0.784442724 | 0.001034391 |
| AC005562.1    | 2 | 1                        | 0.776315789 | 0.001040104 |
| C18orf25      | 2 | 0.000328413              | 0.899767802 | 0.001088997 |
| HGS           | 2 | 2.42278x10 <sup>-5</sup> | 0.846749226 | 0.001090806 |
| CENPN         | 2 | 0.645228028              | 0.761996904 | 0.001132196 |
| RAP2C         | 2 | 0.007598692              | 0.870743034 | 0.001132196 |
| SUPT3H        | 2 | 3.55057x10 <sup>-5</sup> | 0.891640867 | 0.001142597 |
| CCDC82        | 2 | 0.081230044              | 0.834365325 | 0.001162073 |
| FARSB         | 2 | 0.019830719              | 0.849845201 | 0.001187573 |
| ELF1          | 2 | 0.312032177              | 0.818498452 | 0.001192889 |
| EIF2S1        | 2 | 0.014499006              | 0.866099071 | 0.00121388  |
| EXOSC8        | 2 | 0.851335855              | 0.797600619 | 0.001216495 |
| ATP5J         | 2 | 1                        | 0.758900929 | 0.001261883 |
| PAPOLG        | 2 | 1                        | 0.758900929 | 0.001264902 |
| TBC1D15       | 2 | 0.032592239              | 0.854876161 | 0.001266985 |
| PPP6R3        | 2 | 1                        | 0.780185759 | 0.001283739 |
| TIPARP        | 2 | 0.001049661              | 0.894736842 | 0.001340228 |
| NUP205        | 2 | 0.000331556              | 0.906733746 | 0.001373748 |
| RTCA          | 2 | 0.126699185              | 0.830495356 | 0.001374812 |
| DMTF1         | 2 | 0.153782497              | 0.828947368 | 0.001393338 |
| GIGYF1        | 2 | 0.173462828              | 0.825077399 | 0.001427875 |
| DCAF16        | 2 | 1                        | 0.775541796 | 0.001430801 |
| POLQ          | 2 | 0.03199207               | 0.85255418  | 0.00144762  |
| RLF           | 2 | 0.230712982              | 0.807662539 | 0.001465101 |
| RBM27         | 2 | 0.581594736              | 0.803405573 | 0.001482099 |
| RRBP1         | 2 | 1                        | 0.788312693 | 0.00148507  |
| PDCD4         | 2 | 1                        | 0.744195046 | 0.001490968 |
| AC004166.6    | 2 | 0.000298513              | 0.861455108 | 0.001496635 |



|              |   |                          |             |             |
|--------------|---|--------------------------|-------------|-------------|
| KIAA0146     | 2 | 0.296103429              | 0.816563467 | 0.001537857 |
| PLEKHH2      | 2 | 0.13556235               | 0.823529412 | 0.001565702 |
| LAMP5        | 2 | 3.57793x10 <sup>-6</sup> | 0.785990712 | 0.001582577 |
| TMEM164      | 2 | 0.001386812              | 0.853328173 | 0.001601038 |
| SNIP1        | 2 | 0.000358859              | 0.863003096 | 0.001640509 |
| SCRN1        | 2 | 0.000317306              | 0.873839009 | 0.001662082 |
| RP11-26F2.1  | 2 | 0.000980189              | 0.810371517 | 0.001670212 |
| RBBP8        | 2 | 0.278478319              | 0.797600619 | 0.00169174  |
| EPC1         | 2 | 1                        | 0.685371517 | 0.00171768  |
| ZNF621       | 2 | 1                        | 0.779798762 | 0.001729295 |
| TMEM43       | 2 | 0.078529403              | 0.839009288 | 0.001738616 |
| SCARB2       | 2 | 0.924922222              | 0.797213622 | 0.001773332 |
| LAMP2        | 2 | 0.113681167              | 0.833591331 | 0.001794577 |
| MAFG         | 2 | 0.008276921              | 0.86377709  | 0.00181256  |
| MRI1         | 2 | 0.003799465              | 0.876160991 | 0.001845367 |
| HSPG2        | 2 | 0.113815966              | 0.826625387 | 0.001848306 |
| YME1L1       | 2 | 1                        | 0.796439628 | 0.001853101 |
| NUTM2A-AS1   | 2 | 1                        | 0.790247678 | 0.001889425 |
| DLEU2        | 2 | 0.006557059              | 0.856037152 | 0.001918164 |
| KIAA1671     | 2 | 0.253774713              | 0.815789474 | 0.002012216 |
| ZNF577       | 2 | 0.002454631              | 0.865325077 | 0.002070139 |
| ETF1         | 2 | 1                        | 0.727941176 | 0.002126146 |
| FAM49B       | 2 | 0.807499644              | 0.801083591 | 0.002137801 |
| CLNS1A       | 2 | 1                        | 0.710526316 | 0.002141852 |
| TTLL5        | 2 | 1                        | 0.790634675 | 0.002154408 |
| MRPL39       | 2 | 0.000150419              | 0.882352941 | 0.002191523 |
| HNRNPA1P15   | 2 | 4.22302x10 <sup>-6</sup> | 0.763157895 | 0.002194183 |
| CTD-2003D5.1 | 2 | 4.23292x10 <sup>-6</sup> | 0.763157895 | 0.002198674 |
| RAB3D        | 2 | 0.036597659              | 0.844040248 | 0.002211723 |
| CDS2         | 2 | 1                        | 0.794117647 | 0.002257923 |
| TCERG1       | 2 | 0.118507246              | 0.834365325 | 0.002270629 |
| OCIAD2       | 2 | 0.001097353              | 0.886996904 | 0.002291731 |
| CXCR4        | 2 | 0.002531571              | 0.856424149 | 0.002308561 |
| LIN7C        | 2 | 0.103409842              | 0.83630031  | 0.002376011 |

|          |   |                          |             |             |
|----------|---|--------------------------|-------------|-------------|
| RNF144B  | 2 | 0.031290464              | 0.849071207 | 0.002388254 |
| DCTN5    | 2 | 0.0413021                | 0.773219814 | 0.002402806 |
| NCF4     | 2 | 1                        | 0.794504644 | 0.002493144 |
| GMEB1    | 2 | 0.30701617               | 0.817337461 | 0.00249364  |
| NUP155   | 2 | 1                        | 0.760835913 | 0.002527299 |
| PUM2     | 2 | 0.513401822              | 0.808823529 | 0.002555576 |
| ACTR6P1  | 2 | 2.34062x10 <sup>-5</sup> | 0.799148607 | 0.002574077 |
| ZNF589   | 2 | 0.52426414               | 0.799148607 | 0.002581846 |
| CA5B     | 2 | 1                        | 0.769736842 | 0.002609593 |
| METTL21A | 2 | 0.102081446              | 0.835139319 | 0.002621492 |
| ITCH     | 2 | 1                        | 0.770510836 | 0.002627799 |
| CAPS2    | 2 | 1                        | 0.792569659 | 0.002639899 |
| ALOX5    | 2 | 0.123917853              | 0.755417957 | 0.002724169 |
| GPR183   | 2 | 0.001228237              | 0.808049536 | 0.002724468 |
| RRP1     | 2 | 1                        | 0.747678019 | 0.002798841 |
| NSMCE2   | 2 | 0.067995669              | 0.839396285 | 0.002832798 |
| PPIE     | 2 | 1                        | 0.755804954 | 0.002915343 |
| MTR      | 2 | 0.283717284              | 0.818885449 | 0.002936287 |
| TET2     | 2 | 0.352785051              | 0.816176471 | 0.002952383 |
| DUTP2    | 2 | 1.15721x10 <sup>-5</sup> | 0.841331269 | 0.002966146 |
| BDH1     | 2 | 0.280730216              | 0.816563467 | 0.002999225 |
| TDP1     | 2 | 0.302087308              | 0.809597523 | 0.003034839 |
| CERCAM   | 2 | 0.024706974              | 0.846749226 | 0.003067585 |
| SPC25    | 2 | 0.043729785              | 0.839396285 | 0.003078681 |
| COA1     | 2 | 1                        | 0.771671827 | 0.003082962 |
| C12orf45 | 2 | 6.04578x10 <sup>-5</sup> | 0.899767802 | 0.00315874  |
| ADAM8    | 2 | 0.000334138              | 0.797987616 | 0.00316908  |
| EEF1B2P3 | 2 | 0.000194848              | 0.854876161 | 0.003204616 |
| FNDC3B   | 2 | 1                        | 0.785216718 | 0.003269687 |
| JAK1     | 2 | 0.045225336              | 0.845201238 | 0.003297205 |
| SNX5     | 2 | 0.198149309              | 0.822755418 | 0.003365843 |
| SUSD1    | 2 | 0.001878363              | 0.846749226 | 0.003403351 |
| ARID4A   | 2 | 1                        | 0.781733746 | 0.003414397 |
| FAM175A  | 2 | 0.420426671              | 0.811919505 | 0.003460429 |

|               |   |                          |             |             |
|---------------|---|--------------------------|-------------|-------------|
| CHD7          | 2 | 0.00069745               | 0.872291022 | 0.00350113  |
| CHURC1        | 2 | 0.43305966               | 0.811532508 | 0.003604559 |
| UBE3A         | 2 | 1                        | 0.746904025 | 0.003731831 |
| ERAP2         | 2 | 0.208133608              | 0.822368421 | 0.003792202 |
| USP8          | 2 | 1                        | 0.765092879 | 0.003800204 |
| RFFL          | 2 | 0.138780328              | 0.828947368 | 0.003833298 |
| NUDT19        | 2 | 0.113423482              | 0.834365325 | 0.003846497 |
| KLF7          | 2 | 0.108932178              | 0.832817337 | 0.003872574 |
| NDUFV2        | 2 | 1                        | 0.77747678  | 0.003922146 |
| KIAA0232      | 2 | 0.338372626              | 0.810758514 | 0.003964452 |
| SPTLC2        | 2 | 0.067300361              | 0.843653251 | 0.003986588 |
| SOS2          | 2 | 0.060697198              | 0.839396285 | 0.003995732 |
| RP3-340H11.2  | 2 | $5.80213 \times 10^{-5}$ | 0.832817337 | 0.004016194 |
| MAGOH         | 2 | 0.005551045              | 0.827012384 | 0.004026834 |
| PDE9A         | 2 | $2.82575 \times 10^{-5}$ | 0.780572755 | 0.004055266 |
| ZNF655        | 2 | 0.690422835              | 0.803405573 | 0.004110865 |
| FAM46A        | 2 | 0.008969415              | 0.859133127 | 0.004347255 |
| COQ10B        | 2 | 0.247766459              | 0.807662539 | 0.004443209 |
| ENPP3         | 2 | 0.018261036              | 0.79876161  | 0.004464783 |
| SLC24A3       | 2 | $3.21734 \times 10^{-5}$ | 0.779411765 | 0.004588525 |
| C1orf56       | 2 | 0.107492719              | 0.82120743  | 0.004627111 |
| ANKRD40       | 2 | 1                        | 0.734133127 | 0.004629916 |
| FSD1L         | 2 | 0.014853373              | 0.854102167 | 0.004631345 |
| NUF2          | 2 | 0.009179657              | 0.847910217 | 0.004707075 |
| CENPC1        | 2 | 1                        | 0.746130031 | 0.004717309 |
| YEATS4        | 2 | 0.053875285              | 0.833978328 | 0.004723473 |
| MAGED2        | 2 | 0.000531652              | 0.851393189 | 0.004755894 |
| CSNK1E        | 2 | 1                        | 0.73374613  | 0.004787204 |
| CKAP2L        | 2 | 1                        | 0.770510836 | 0.004817352 |
| NUPL1         | 2 | 1                        | 0.720201238 | 0.004838716 |
| CISD2         | 2 | 0.002777856              | 0.857585139 | 0.004843926 |
| RP11-749H20.3 | 2 | 1                        | 0.734133127 | 0.004898267 |
| BLM           | 2 | 0.602266162              | 0.792956656 | 0.004914241 |
| SLC35F2       | 2 | 0.057224477              | 0.840170279 | 0.004915262 |

|            |   |                          |             |             |
|------------|---|--------------------------|-------------|-------------|
| ARL6IP6    | 2 | 0.000430436              | 0.857585139 | 0.004972177 |
| KIAA1958   | 2 | 0.196600553              | 0.82004644  | 0.005015044 |
| IL18R1     | 2 | 0.424932235              | 0.773219814 | 0.005036519 |
| ATP11B     | 2 | 0.274753848              | 0.811919505 | 0.005046322 |
| PSMA2      | 2 | 1                        | 0.710913313 | 0.005144956 |
| DDIT3      | 2 | 0.002699611              | 0.839009288 | 0.005206398 |
| METTL21B   | 2 | 0.012167489              | 0.863390093 | 0.005358749 |
| RLIM       | 2 | 1                        | 0.743421053 | 0.005650024 |
| SLC39A10   | 2 | 1                        | 0.727167183 | 0.005651765 |
| AC012358.4 | 2 | 4.33964x10 <sup>-5</sup> | 0.758126935 | 0.005669745 |
| C4orf32    | 2 | 4.34147x10 <sup>-5</sup> | 0.758126935 | 0.005671848 |
| AUNIP      | 2 | 0.004691505              | 0.854876161 | 0.005687556 |
| PEAK1      | 2 | 1                        | 0.746130031 | 0.00569956  |
| RIN3       | 2 | 0.024601152              | 0.828173375 | 0.00569956  |
| SOD2       | 2 | 1                        | 0.791795666 | 0.005712448 |
| BARD1      | 2 | 0.008118648              | 0.871904025 | 0.005725881 |
| PSMD12     | 2 | 1                        | 0.794117647 | 0.005809046 |
| BEND4      | 2 | 2.93328x10 <sup>-5</sup> | 0.780185759 | 0.00586471  |
| RNF4       | 2 | 0.26405003               | 0.817724458 | 0.005900481 |
| RPS6KA3    | 2 | 0.272799437              | 0.818885449 | 0.005975973 |
| PRC1       | 2 | 1                        | 0.791408669 | 0.005991951 |
| PRPF39     | 2 | 0.147703649              | 0.825851393 | 0.006042821 |
| ZNF660     | 2 | 0.380468788              | 0.810371517 | 0.006073775 |
| CDK11B     | 2 | 0.019005256              | 0.829721362 | 0.006084346 |
| LYPLA1     | 2 | 1                        | 0.746130031 | 0.006123408 |
| SIRT2      | 2 | 1                        | 0.787151703 | 0.006172737 |
| LNPEP      | 2 | 1                        | 0.791021672 | 0.006203963 |
| ADO        | 2 | 0.000647607              | 0.828560372 | 0.006226037 |
| YTHDC2     | 2 | 0.477405399              | 0.799922601 | 0.006319426 |
| RAB27A     | 2 | 0.134728113              | 0.831656347 | 0.00638418  |
| CASP9      | 2 | 1                        | 0.785990712 | 0.006445642 |
| TMED8      | 2 | 0.432122494              | 0.811145511 | 0.006468638 |
| SLC10A7    | 2 | 0.000441849              | 0.823529412 | 0.006554743 |
| CENPE      | 2 | 1                        | 0.790634675 | 0.006588115 |

|               |   |                          |             |             |
|---------------|---|--------------------------|-------------|-------------|
| CASC3         | 2 | 0.515195272              | 0.806888545 | 0.006590811 |
| RRN3P1        | 2 | 0.428770264              | 0.809210526 | 0.006620315 |
| STAT3         | 2 | 0.189732694              | 0.825077399 | 0.00672027  |
| RNF19B        | 2 | 2.75268x10 <sup>-5</sup> | 0.833591331 | 0.006848798 |
| ZNF433        | 2 | 0.157271262              | 0.811145511 | 0.006908235 |
| GABPB1        | 2 | 0.42055109               | 0.810371517 | 0.007047828 |
| TLK1          | 2 | 0.591816294              | 0.806888545 | 0.007090851 |
| CNP           | 2 | 0.044405527              | 0.834365325 | 0.007156332 |
| AL139099.1    | 2 | 1                        | 0.77128483  | 0.007195718 |
| ORC2          | 2 | 1                        | 0.782894737 | 0.007213498 |
| RETSAT        | 2 | 9.70182x10 <sup>-5</sup> | 0.802244582 | 0.007281919 |
| ACTR8         | 2 | 0.000248817              | 0.824303406 | 0.007291353 |
| ELOVL6        | 2 | 0.097391416              | 0.818111455 | 0.00731561  |
| RMND5A        | 2 | 0.121018048              | 0.831656347 | 0.007426169 |
| SERP1         | 2 | 1                        | 0.763157895 | 0.007444624 |
| TMA16         | 2 | 1                        | 0.755804954 | 0.007541189 |
| SMYD4         | 2 | 1                        | 0.776702786 | 0.007567606 |
| SYNRG         | 2 | 1                        | 0.731037152 | 0.007655307 |
| ZBTB8OS       | 2 | 1                        | 0.790634675 | 0.007835171 |
| FRYL          | 2 | 1                        | 0.739164087 | 0.00787675  |
| EMC3          | 2 | 1                        | 0.760835913 | 0.008085083 |
| BCL9          | 2 | 2.66446x10 <sup>-5</sup> | 0.780959752 | 0.008200225 |
| MON2          | 2 | 0.080018649              | 0.838622291 | 0.008369915 |
| RP5-1158E12.3 | 2 | 0.002038132              | 0.88119195  | 0.008380426 |
| ABCB1         | 2 | 0.00025118               | 0.786764706 | 0.008406235 |
| WHAMM         | 2 | 0.09176118               | 0.835913313 | 0.008441474 |
| BUB1B         | 2 | 1                        | 0.784442724 | 0.008668443 |
| MTF2          | 2 | 1                        | 0.785990712 | 0.008821774 |
| NUMA1         | 2 | 1                        | 0.776315789 | 0.009142526 |
| PVRL4         | 2 | 0.04891159               | 0.838622291 | 0.009192867 |
| TRAPPC6B      | 2 | 1                        | 0.775154799 | 0.009211574 |
| MB21D1        | 2 | 1                        | 0.78869969  | 0.009213343 |
| MRPL42        | 2 | 1                        | 0.755804954 | 0.009397721 |
| NPHP3         | 2 | 1                        | 0.773219814 | 0.009476031 |

|               |   |                          |             |             |
|---------------|---|--------------------------|-------------|-------------|
| SRSF2         | 2 | 0.13154926               | 0.827786378 | 0.009510376 |
| EIF2B1        | 2 | 0.009856017              | 0.853328173 | 0.009690859 |
| TAX1BP1       | 2 | 1                        | 0.724458204 | 0.009716192 |
| NDUFA4        | 2 | 1                        | 0.700851393 | 0.009924799 |
| PRKAA1        | 2 | 1                        | 0.751547988 | 0.00996188  |
| RP11-497H16.6 | 2 | 1                        | 0.689241486 | 0.010068961 |
| PATL1         | 2 | 0.000581572              | 0.854102167 | 0.01009413  |
| PSMD1         | 2 | 1                        | 0.767801858 | 0.010212581 |
| SMU1          | 2 | 0.386451871              | 0.814241486 | 0.010270323 |
| RP11-677N16.1 | 2 | $6.63194 \times 10^{-5}$ | 0.773993808 | 0.010280507 |
| RGS10         | 2 | 0.04197384               | 0.820820433 | 0.010334196 |
| TINAGL1       | 2 | 1                        | 0.762383901 | 0.010456048 |
| CDK2          | 2 | 0.000977246              | 0.872678019 | 0.010588615 |
| JMJD6         | 2 | 0.578929207              | 0.77244582  | 0.010600308 |
| RP11-894P9.1  | 2 | 0.226608275              | 0.813080495 | 0.010775983 |
| ERBB2IP       | 2 | 1                        | 0.780959752 | 0.01096716  |
| RP11-91120.4  | 2 | 1                        | 0.784055728 | 0.010982658 |
| ZNF761        | 2 | 0.714077107              | 0.79876161  | 0.010982658 |
| CSE1L         | 2 | 1                        | 0.783668731 | 0.011225337 |
| ZNF271        | 2 | 0.171177702              | 0.821981424 | 0.011306203 |
| TEAD1         | 2 | 0.000188985              | 0.809597523 | 0.011433933 |
| PER2          | 2 | 1                        | 0.784055728 | 0.011483495 |
| SHC1          | 2 | 1                        | 0.780959752 | 0.011732585 |
| KIAA0430      | 2 | 0.013651967              | 0.850232198 | 0.011884955 |
| CREB1         | 2 | 1                        | 0.796052632 | 0.011933742 |
| MARCH7        | 2 | 1                        | 0.785990712 | 0.011964993 |
| PDGFC         | 2 | 0.811950679              | 0.793343653 | 0.012034505 |
| RPL9P32       | 2 | 0.023725912              | 0.814628483 | 0.012057316 |
| ETFB          | 2 | 1                        | 0.77747678  | 0.012057681 |
| SHPK          | 2 | 0.019704537              | 0.797600619 | 0.012261209 |
| GALNT2        | 2 | 1                        | 0.678405573 | 0.012289512 |
| TTBK2         | 2 | 0.019244385              | 0.853328173 | 0.012379124 |
| WARS          | 2 | 0.426673204              | 0.79876161  | 0.012502249 |
| PSMD4         | 2 | 0.664088857              | 0.800696594 | 0.012616536 |

|               |   |                          |             |             |
|---------------|---|--------------------------|-------------|-------------|
| SPAG6         | 2 | 0.049063115              | 0.819659443 | 0.012623303 |
| FYCO1         | 2 | 0.000339267              | 0.844814241 | 0.012681207 |
| EXOC1         | 2 | 0.016608507              | 0.848684211 | 0.012695964 |
| SEC61A1       | 2 | 0.412818721              | 0.802244582 | 0.012736286 |
| F11R          | 2 | 1                        | 0.760448916 | 0.013159075 |
| BEX4          | 2 | 4.13135x10 <sup>-5</sup> | 0.758513932 | 0.0132084   |
| MRPS25        | 2 | 0.698625316              | 0.802244582 | 0.013436885 |
| CTC-359D24.3  | 2 | 1                        | 0.779411765 | 0.013477846 |
| AC144530.1    | 2 | 0.01943968               | 0.835526316 | 0.01357348  |
| TMEM176B      | 2 | 4.37986x10 <sup>-5</sup> | 0.758126935 | 0.013828775 |
| MTHFD2        | 2 | 0.361685157              | 0.814241486 | 0.013850029 |
| ZNF211        | 2 | 0.015950582              | 0.784442724 | 0.013859282 |
| METTL10       | 2 | 0.00285899               | 0.861455108 | 0.013945587 |
| AL365202.1    | 2 | 1                        | 0.780959752 | 0.014405999 |
| EAF1          | 2 | 0.591427338              | 0.79876161  | 0.014491664 |
| MAGED1        | 2 | 0.004494834              | 0.877708978 | 0.014535714 |
| RP11-770J1.4  | 2 | 0.238324112              | 0.813080495 | 0.014566841 |
| FBXW2         | 2 | 1                        | 0.760448916 | 0.014601558 |
| MAMDC2        | 2 | 0.807499644              | 0.718266254 | 0.014767534 |
| NAA38         | 2 | 1                        | 0.774767802 | 0.014818478 |
| SEC63         | 2 | 1                        | 0.748065015 | 0.0151606   |
| SMG1P1        | 2 | 1                        | 0.795665635 | 0.015327574 |
| FXYD5         | 2 | 1                        | 0.775541796 | 0.015361458 |
| MTPAP         | 2 | 1                        | 0.785990712 | 0.015531612 |
| RP11-361D15.2 | 2 | 3.99927x10 <sup>-5</sup> | 0.736842105 | 0.015747018 |
| GIMAP5        | 2 | 4.0227x10 <sup>-5</sup>  | 0.736842105 | 0.015828384 |
| CTD-2547L16.1 | 2 | 0.45473582               | 0.796826625 | 0.015955979 |
| FAM160B1      | 2 | 0.397484337              | 0.801083591 | 0.016008304 |
| MEST          | 2 | 0.195166722              | 0.79373065  | 0.016012143 |
| AC003989.3    | 2 | 4.54602x10 <sup>-5</sup> | 0.757739938 | 0.016081158 |
| TTC21B        | 2 | 1                        | 0.767027864 | 0.016118042 |
| SEC23A        | 2 | 1                        | 0.740325077 | 0.016165463 |
| DENND4C       | 2 | 0.031854189              | 0.845975232 | 0.016279657 |
| ARHGEF6       | 2 | 1                        | 0.745356037 | 0.01661253  |

|             |   |             |             |             |
|-------------|---|-------------|-------------|-------------|
| CD27-AS1    | 2 | 1           | 0.768575851 | 0.016783462 |
| ATG16L2     | 2 | 1           | 0.763931889 | 0.017021805 |
| RSBNIL-AS1  | 2 | 1           | 0.783668731 | 0.017082465 |
| RALGAPA2    | 2 | 0.136925989 | 0.819659443 | 0.017090256 |
| SLK         | 2 | 0.044267112 | 0.846749226 | 0.017378834 |
| AC096558.1  | 2 | 0.002906088 | 0.824690402 | 0.017567522 |
| ALYREF      | 2 | 1           | 0.720588235 | 0.01756814  |
| PRDX3       | 2 | 1           | 0.70626935  | 0.017570981 |
| LSM12       | 2 | 1           | 0.762770898 | 0.017593565 |
| PDS5B       | 2 | 1           | 0.734907121 | 0.017596358 |
| ANKHD1      | 2 | 1           | 0.707430341 | 0.017742046 |
| GRSF1       | 2 | 1           | 0.743421053 | 0.017743488 |
| PYGB        | 2 | 0.000891609 | 0.855650155 | 0.017962006 |
| SEPT2       | 2 | 1           | 0.756578947 | 0.018046147 |
| BBS9        | 2 | 0.000221941 | 0.808049536 | 0.018064771 |
| ADH5        | 2 | 0.532370475 | 0.805727554 | 0.018347798 |
| EIF1AX      | 2 | 1           | 0.760835913 | 0.018378243 |
| CCDC163P    | 2 | 1           | 0.785603715 | 0.018580382 |
| ATL3        | 2 | 1           | 0.737616099 | 0.018619402 |
| PLAU        | 2 | 0.004065472 | 0.795278638 | 0.018871744 |
| SRCAP       | 2 | 1           | 0.746517028 | 0.019088591 |
| BVES        | 2 | 0.576716456 | 0.801470588 | 0.019161507 |
| KATNAL1     | 2 | 0.640740057 | 0.804566563 | 0.019313363 |
| MTRR        | 2 | 0.03115259  | 0.827012384 | 0.019515057 |
| CALR        | 2 | 1           | 0.731811146 | 0.019568599 |
| SEP15       | 2 | 1           | 0.782120743 | 0.019940867 |
| KHDRBS1     | 2 | 1           | 0.788312693 | 0.019971257 |
| FCHSD1      | 2 | 1           | 0.744195046 | 0.020014168 |
| AEBP2       | 2 | 1           | 0.769736842 | 0.020077404 |
| RP11-39E3.6 | 2 | 0.003529685 | 0.806114551 | 0.020089931 |
| RP11-6D1.6  | 2 | 0.018343722 | 0.834365325 | 0.020103943 |
| TEC         | 2 | 0.038038563 | 0.824303406 | 0.020178478 |
| DHX35       | 2 | 0.171708429 | 0.810758514 | 0.020608859 |
| CBWD2       | 2 | 1           | 0.679566563 | 0.020798986 |



|               |   |                          |             |             |
|---------------|---|--------------------------|-------------|-------------|
| FADS1         | 2 | 0.192050471              | 0.821594427 | 0.021165448 |
| PTCD3         | 2 | 1                        | 0.703173375 | 0.021284788 |
| TGFBR2        | 2 | 0.157562302              | 0.804953556 | 0.02163704  |
| COX8A         | 2 | 1                        | 0.747678019 | 0.021714453 |
| AC000068.5    | 2 | 0.001083499              | 0.830882353 | 0.021787111 |
| RP11-231D20.1 | 2 | 0.000509385              | 0.7875387   | 0.02209359  |
| C1orf112      | 2 | 0.070443697              | 0.828560372 | 0.022396753 |
| RP11-603K19.1 | 2 | 0.00039762               | 0.767801858 | 0.022412579 |
| MGST3         | 2 | 1                        | 0.761609907 | 0.022591818 |
| RP11-384K6.2  | 2 | 0.010924983              | 0.818498452 | 0.022607712 |
| CHTF18        | 2 | 0.227786152              | 0.800696594 | 0.022619558 |
| DCUN1D3       | 2 | 0.000598082              | 0.772058824 | 0.022697615 |
| UTP6          | 2 | 1                        | 0.715170279 | 0.022729921 |
| TMEM14A       | 2 | 8.66332x10 <sup>-5</sup> | 0.844814241 | 0.023215528 |
| CCNL2         | 2 | 0.185835625              | 0.823142415 | 0.023226495 |
| PCNT          | 2 | 0.071198551              | 0.839783282 | 0.023634274 |
| KRR1          | 2 | 0.083532058              | 0.835139319 | 0.023636066 |
| MIAT          | 2 | 0.141113317              | 0.775154799 | 0.024030312 |
| ANXA9         | 2 | 7.46078x10 <sup>-5</sup> | 0.754256966 | 0.024116941 |
| FEM1C         | 2 | 0.840984676              | 0.768962848 | 0.02447388  |
| CHD4          | 2 | 0.360233952              | 0.815402477 | 0.024524487 |
| AC027612.3    | 2 | 0.006163584              | 0.763544892 | 0.024648315 |
| QSOX1         | 2 | 0.573687426              | 0.79373065  | 0.024727504 |
| CCP110        | 2 | 0.819685635              | 0.797213622 | 0.024863316 |
| ING3          | 2 | 1                        | 0.777089783 | 0.025032589 |
| CMTM6         | 2 | 1                        | 0.744582043 | 0.025111308 |
| MICU1         | 2 | 0.000218012              | 0.835913313 | 0.02539835  |
| HELZ          | 2 | 1                        | 0.767027864 | 0.025501719 |
| WHSC1         | 2 | 1                        | 0.721362229 | 0.025799421 |
| CDC7          | 2 | 0.110595539              | 0.800309598 | 0.025946238 |
| MICAL1        | 2 | 0.001982238              | 0.84249226  | 0.026075588 |
| COX4I1        | 2 | 1                        | 0.736455108 | 0.026094977 |
| KDM5A         | 2 | 1                        | 0.710139319 | 0.0261781   |
| APIG1         | 2 | 0.426040123              | 0.79876161  | 0.026203097 |

|               |   |             |             |             |
|---------------|---|-------------|-------------|-------------|
| ARF6          | 2 | 1           | 0.763157895 | 0.026409572 |
| RP11-726G1.1  | 2 | 0.358208498 | 0.801470588 | 0.026917631 |
| MPC2          | 2 | 0.386304403 | 0.810371517 | 0.027205759 |
| CORO1C        | 2 | 1           | 0.783281734 | 0.027364116 |
| OMD           | 2 | 0.000660733 | 0.877708978 | 0.027412511 |
| RP11-645N11.2 | 2 | 0.00118296  | 0.838622291 | 0.027493678 |
| RP11-85F14.1  | 2 | 0.000125982 | 0.768962848 | 0.027617691 |
| NDC80         | 2 | 1           | 0.748839009 | 0.027729552 |
| ZNF789        | 2 | 1           | 0.789086687 | 0.028336739 |
| RP11-629F19.1 | 2 | 0.000791971 | 0.761996904 | 0.028380365 |
| MKL1          | 2 | 0.016911992 | 0.849845201 | 0.028656496 |
| CCDC28A       | 2 | 0.00683596  | 0.827786378 | 0.028712719 |
| PHTF2         | 2 | 1           | 0.784829721 | 0.028759461 |
| CLTC          | 2 | 1           | 0.753095975 | 0.028872553 |
| GMPR          | 2 | 0.129038065 | 0.790634675 | 0.029331098 |
| TMEM184C      | 2 | 1           | 0.740325077 | 0.029588768 |
| DNAJB14       | 2 | 1           | 0.753482972 | 0.029858366 |
| BRD3          | 2 | 0.315812313 | 0.809597523 | 0.029883233 |
| MELK          | 2 | 0.021400331 | 0.851006192 | 0.029927761 |
| RBL1          | 2 | 1           | 0.742647059 | 0.030309403 |
| ZNF516        | 2 | 0.249732587 | 0.816950464 | 0.030847168 |
| NUPL2         | 2 | 1           | 0.774380805 | 0.030920161 |
| DOPEY1        | 2 | 1           | 0.768188854 | 0.031313029 |
| CASP8AP2      | 2 | 1           | 0.71749226  | 0.031409896 |
| RP11-674J14.3 | 2 | 0.000305553 | 0.811145511 | 0.031430094 |
| RNF2          | 2 | 0.012750091 | 0.851393189 | 0.031438417 |
| EIF3D         | 2 | 1           | 0.726006192 | 0.031490313 |
| FOXN2         | 2 | 1           | 0.762770898 | 0.031609344 |
| ARHGEF12      | 2 | 1           | 0.69620743  | 0.031700715 |
| CAAP1         | 2 | 0.00089863  | 0.845588235 | 0.031700715 |
| DCUN1D1       | 2 | 1           | 0.795665635 | 0.032258479 |
| MOB1A         | 2 | 1           | 0.734520124 | 0.032706813 |
| GAPDHP14      | 2 | 0.000244354 | 0.779798762 | 0.032829311 |
| WDR26         | 2 | 0.991589403 | 0.796826625 | 0.032997645 |

|               |   |             |             |             |
|---------------|---|-------------|-------------|-------------|
| RANBP9        | 2 | 1           | 0.785990712 | 0.033025639 |
| ZBTB17        | 2 | 1           | 0.753869969 | 0.033054833 |
| ZCRB1         | 2 | 1           | 0.777863777 | 0.0331959   |
| ZBTB21        | 2 | 0.153782497 | 0.791021672 | 0.03323649  |
| NPL           | 2 | 1           | 0.731424149 | 0.033412235 |
| LPHN3         | 2 | 0.05318652  | 0.735294118 | 0.033645953 |
| CDK5RAP1      | 2 | 1           | 0.752708978 | 0.033714454 |
| PRSS16        | 2 | 0.00048044  | 0.840944272 | 0.034049531 |
| NAA16         | 2 | 1           | 0.774767802 | 0.034203581 |
| RBM7          | 2 | 0.257403257 | 0.816176471 | 0.034594339 |
| CDK19         | 2 | 1           | 0.777863777 | 0.035018662 |
| ZNF704        | 2 | 1           | 0.769349845 | 0.035098139 |
| AGO4          | 2 | 1           | 0.737229102 | 0.035135516 |
| RP11-665C16.1 | 2 | 0.001880833 | 0.813080495 | 0.035167549 |
| DNAJC2        | 2 | 1           | 0.727167183 | 0.03532465  |
| NEK7          | 2 | 0.154681661 | 0.816563467 | 0.035542856 |
| USF1P1        | 2 | 0.00042548  | 0.731424149 | 0.036013772 |
| RP11-646J21.7 | 2 | 0.00042565  | 0.731424149 | 0.036027239 |
| ECT2          | 2 | 1           | 0.791408669 | 0.036273701 |
| RP11-517I3.1  | 2 | 0.000465075 | 0.730650155 | 0.036585592 |
| NDUFAF6       | 2 | 1           | 0.743034056 | 0.036984739 |
| ZFX           | 2 | 1           | 0.774767802 | 0.036984739 |
| CD53          | 2 | 1           | 0.683436533 | 0.037048087 |
| FAM162A       | 2 | 1           | 0.770897833 | 0.037501819 |
| ZNF611        | 2 | 0.00022455  | 0.808049536 | 0.03775572  |
| RFPL4AL1      | 2 | 0.000501831 | 0.730263158 | 0.037923526 |
| ELOVL7        | 2 | 0.005744608 | 0.849458204 | 0.038108442 |
| AMZ2P1        | 2 | 0.002173791 | 0.785990712 | 0.038164647 |
| SEPT7         | 2 | 1           | 0.732972136 | 0.038178254 |
| RP11-533E19.3 | 2 | 0.000186229 | 0.782120743 | 0.039061284 |
| PIK3R1        | 2 | 1           | 0.768188854 | 0.039847044 |
| PIKFYVE       | 2 | 1           | 0.738390093 | 0.039939611 |
| RP3-467K16.4  | 2 | 0.648480914 | 0.803405573 | 0.040148355 |
| TGOLN2        | 2 | 1           | 0.708591331 | 0.040832036 |

|              |   |             |             |             |
|--------------|---|-------------|-------------|-------------|
| KLF13        | 2 | 0.051059324 | 0.834752322 | 0.041247077 |
| TDP2         | 2 | 0.000473189 | 0.822755418 | 0.042205612 |
| TTI1         | 2 | 0.001052693 | 0.832430341 | 0.043009061 |
| RP11-313I2.6 | 2 | 0.000883683 | 0.726006192 | 0.043082142 |
| ZNF662       | 2 | 0.546030934 | 0.807662539 | 0.043411442 |
| WIZ          | 2 | 0.006724883 | 0.851780186 | 0.043457127 |
| HINT2        | 2 | 0.000186838 | 0.821594427 | 0.043951606 |
| ELOVL5       | 2 | 1           | 0.776315789 | 0.044056574 |
| RP11-809N8.2 | 2 | 0.000177646 | 0.76625387  | 0.044199962 |
| SRRM2        | 2 | 0.724549685 | 0.795278638 | 0.044199962 |
| EDA2R        | 2 | 0.030613045 | 0.795665635 | 0.044363309 |
| SLC22A20     | 2 | 0.131137687 | 0.805727554 | 0.044452403 |
| PPP1R2       | 2 | 1           | 0.787151703 | 0.04462198  |
| GS1-256O22.1 | 2 | 1           | 0.784055728 | 0.045927024 |
| AGO2         | 2 | 0.072221286 | 0.808823529 | 0.046037893 |
| ACTL6A       | 2 | 1           | 0.768962848 | 0.046248611 |
| CYTH1        | 2 | 0.106386638 | 0.757352941 | 0.046988515 |
| UGP2         | 2 | 1           | 0.773219814 | 0.047417303 |
| ZFAND4       | 2 | 0.066128139 | 0.822755418 | 0.047417303 |
| SLC39A1      | 2 | 0.000286727 | 0.785603715 | 0.047500349 |
| TMEM167A     | 2 | 1           | 0.741099071 | 0.047528316 |
| TPSAB1       | 2 | 0.613074892 | 0.707430341 | 0.047553131 |
| LYZ          | 2 | 0.123501886 | 0.82004644  | 0.047558535 |
| SNRK         | 2 | 0.149590273 | 0.821594427 | 0.047898098 |
| DTL          | 2 | 1           | 0.742260062 | 0.047984172 |
| NANS         | 2 | 1           | 0.696981424 | 0.048002159 |
| DPYD         | 2 | 1           | 0.776702786 | 0.048230324 |
| CDC25A       | 2 | 0.000572367 | 0.80495356  | 0.048312701 |
| TTC7B        | 2 | 0.217944621 | 0.819272446 | 0.048371115 |
| DAPP1        | 2 | 0.013586605 | 0.850619195 | 0.04919331  |
| PIP5K1A      | 2 | 1           | 0.779798762 | 0.04957429  |
| TM6SF1       | 2 | 0.261409512 | 0.727941176 | 0.049861019 |
| TMED5        | 2 | 1           | 0.765866873 | 0.049908077 |
| MLH1         | 2 | 1           | 0.739164087 | 0.049976177 |

|               |   |             |             |                           |
|---------------|---|-------------|-------------|---------------------------|
| DSC2          | 3 | 0.108035803 | 0.846153846 | 1.70883x10 <sup>-10</sup> |
| GOLGA8A       | 3 | 0.154125267 | 0.861226611 | 8.64447x10 <sup>-9</sup>  |
| BTBD19        | 3 | 0.081133501 | 0.889293139 | 1.161x10 <sup>-6</sup>    |
| CCND2         | 3 | 0.250640563 | 0.869022869 | 1.67928x10 <sup>-6</sup>  |
| NR6A1         | 3 | 1           | 0.824324324 | 3.38914x10 <sup>-6</sup>  |
| STXBP5        | 3 | 1           | 0.818087318 | 3.57665x10 <sup>-6</sup>  |
| ARHGAP5       | 3 | 1           | 0.802494802 | 9.55014x10 <sup>-6</sup>  |
| AC139677.6    | 3 | 0.120021572 | 0.878898129 | 1.33987x10 <sup>-5</sup>  |
| CAMK1D        | 3 | 1           | 0.832120582 | 2.59184x10 <sup>-5</sup>  |
| KLHL7-AS1     | 3 | 1           | 0.831081081 | 3.37073x10 <sup>-5</sup>  |
| AC083884.8    | 3 | 1           | 0.799376299 | 3.602x10 <sup>-5</sup>    |
| FUK           | 3 | 0.767244906 | 0.838877339 | 4.25734x10 <sup>-5</sup>  |
| RP11-113D6.10 | 3 | 1           | 0.81029106  | 6.0487x10 <sup>-5</sup>   |
| UBA6          | 3 | 1           | 0.83991684  | 7.20521x10 <sup>-5</sup>  |
| RP11-514P8.6  | 3 | 1           | 0.813929314 | 9.17861x10 <sup>-5</sup>  |
| RHOB          | 3 | 1           | 0.783783784 | 0.000107088               |
| THUMPD1       | 3 | 0.880800145 | 0.845114345 | 0.000126318               |
| CCNC          | 3 | 1           | 0.802494802 | 0.000144798               |
| CASP8         | 3 | 1           | 0.753638254 | 0.000152214               |
| AHCTF1        | 3 | 1           | 0.817567568 | 0.000190588               |
| MYRF          | 3 | 0.503871459 | 0.787422037 | 0.000191879               |
| GREM2         | 3 | 0.26750294  | 0.854989605 | 0.000194084               |
| STON2         | 3 | 1           | 0.830561331 | 0.000253694               |
| PPM1B         | 3 | 1           | 0.827442827 | 0.00027658                |
| FAM20B        | 3 | 1           | 0.776507277 | 0.000282894               |
| RAB1A         | 3 | 1           | 0.820686071 | 0.000284949               |
| ADAM17        | 3 | 1           | 0.794178794 | 0.000306464               |
| ADD3          | 3 | 1           | 0.817047817 | 0.000314792               |
| NUP133        | 3 | 1           | 0.838877339 | 0.000337796               |
| GLS           | 3 | 1           | 0.741683992 | 0.000360309               |
| TIMM23        | 3 | 1           | 0.800935551 | 0.000371561               |
| SREBF2        | 3 | 1           | 0.815488565 | 0.000401366               |
| HPSE          | 3 | 1           | 0.835239085 | 0.000447263               |
| PAPD4         | 3 | 1           | 0.785343035 | 0.000473879               |

|              |   |             |             |             |
|--------------|---|-------------|-------------|-------------|
| GPR98        | 3 | 1           | 0.8004158   | 0.000477122 |
| USP3         | 3 | 1           | 0.832120582 | 0.000477444 |
| TXNDC15      | 3 | 1           | 0.772349272 | 0.00049127  |
| RP11-103G8.2 | 3 | 1           | 0.797297297 | 0.000511935 |
| ZMYND8       | 3 | 1           | 0.716735967 | 0.000549728 |
| OAF          | 3 | 1           | 0.792099792 | 0.00055323  |
| GLIS3        | 3 | 0.234248937 | 0.781704782 | 0.000657906 |
| USP15        | 3 | 1           | 0.738045738 | 0.000671241 |
| ZMAT5        | 3 | 0.645947596 | 0.848752599 | 0.000733738 |
| CARS         | 3 | 1           | 0.79989605  | 0.00073915  |
| LENG8        | 3 | 0.589194033 | 0.832640333 | 0.000783469 |
| MATN2        | 3 | 1           | 0.788981289 | 0.000798856 |
| YAF2         | 3 | 0.584680385 | 0.854989605 | 0.000842374 |
| MRPS22       | 3 | 1           | 0.707900208 | 0.000858155 |
| ADRBK2       | 3 | 1           | 0.767671518 | 0.000866009 |
| RNF149       | 3 | 1           | 0.784823285 | 0.000902069 |
| POLK         | 3 | 1           | 0.822765073 | 0.000962951 |
| ABCA13       | 3 | 1           | 0.803534304 | 0.001067687 |
| GOLGA4       | 3 | 1           | 0.715696466 | 0.001080389 |
| USP22        | 3 | 1           | 0.776507277 | 0.001098389 |
| MXD4         | 3 | 0.905185239 | 0.828482328 | 0.001111481 |
| CCDC144A     | 3 | 1           | 0.75        | 0.001115222 |
| NADSYN1      | 3 | 1           | 0.831081081 | 0.001354192 |
| HACE1        | 3 | 0.809989881 | 0.847193347 | 0.001391821 |
| APAF1        | 3 | 1           | 0.771309771 | 0.001491552 |
| AGAP11       | 3 | 1           | 0.796257796 | 0.001599197 |
| RUFY2        | 3 | 0.753015042 | 0.848232848 | 0.001601527 |
| QRICH1       | 3 | 1           | 0.805613306 | 0.001697667 |
| PARP15       | 3 | 1           | 0.817047817 | 0.001699922 |
| XPNPEP3      | 3 | 1           | 0.775467775 | 0.001721903 |
| DNAJC16      | 3 | 1           | 0.775467775 | 0.001872422 |
| PINK1-AS     | 3 | 1           | 0.764553015 | 0.00200498  |
| RP1-179N16.3 | 3 | 1           | 0.780665281 | 0.002061619 |
| PDE4D        | 3 | 1           | 0.774948025 | 0.002098023 |

|               |   |             |             |             |
|---------------|---|-------------|-------------|-------------|
| RP4-591N18.2  | 3 | 0.458426404 | 0.856548857 | 0.002133457 |
| PSMA3         | 3 | 1           | 0.77027027  | 0.002230064 |
| IL1RL1        | 3 | 1           | 0.725571726 | 0.002277912 |
| SLC31A1       | 3 | 1           | 0.793139293 | 0.002315076 |
| CTA-373H7.7   | 3 | 1           | 0.823804574 | 0.002326399 |
| PPP1R15B      | 3 | 1           | 0.747920998 | 0.002445174 |
| RP11-841O20.2 | 3 | 1           | 0.762474012 | 0.002445174 |
| KIAA1210      | 3 | 1           | 0.812889813 | 0.002583831 |
| RP11-658F2.8  | 3 | 0.888463368 | 0.844074844 | 0.002682862 |
| YWHAG         | 3 | 1           | 0.77027027  | 0.002731401 |
| GPX1          | 3 | 1           | 0.752079002 | 0.002747783 |
| MED23         | 3 | 1           | 0.758316008 | 0.002898107 |
| CYP4V2        | 3 | 1           | 0.816528067 | 0.003044341 |
| MIR205HG      | 3 | 1           | 0.766632017 | 0.003068881 |
| PGGT1B        | 3 | 1           | 0.780665281 | 0.003306944 |
| DGKD          | 3 | 1           | 0.798856549 | 0.003692663 |
| FBXL13        | 3 | 1           | 0.770790021 | 0.003744369 |
| CEP170        | 3 | 1           | 0.715696466 | 0.003760835 |
| LRRFIP2       | 3 | 1           | 0.808212058 | 0.003782625 |
| MCOLN3        | 3 | 1           | 0.718814969 | 0.003855363 |
| Z73979.1      | 3 | 1           | 0.772869023 | 0.003988003 |
| LARP4B        | 3 | 1           | 0.660602911 | 0.004427097 |
| QTRTD1        | 3 | 1           | 0.75987526  | 0.004704688 |
| EBF2          | 3 | 0.003472922 | 0.898648649 | 0.004752186 |
| SIK3          | 3 | 0.53879306  | 0.844074844 | 0.00477741  |
| PTAFR         | 3 | 1           | 0.824324324 | 0.004796654 |
| AC009951.1    | 3 | 1           | 0.820686071 | 0.004814677 |
| ZNF785        | 3 | 1           | 0.801975052 | 0.004817352 |
| SCN7A         | 3 | 1           | 0.77962578  | 0.004893158 |
| TRPM7         | 3 | 1           | 0.75987526  | 0.004979875 |
| COL19A1       | 3 | 0.685330871 | 0.843035343 | 0.004994575 |
| MIAP          | 3 | 1           | 0.774948025 | 0.005022892 |
| TSNAX         | 3 | 1           | 0.734927235 | 0.005118598 |
| SOCS2-AS1     | 3 | 1           | 0.76039501  | 0.005374818 |

|                |   |             |             |             |
|----------------|---|-------------|-------------|-------------|
| XPNPEP1        | 3 | 1           | 0.722972973 | 0.005520957 |
| CRBN           | 3 | 1           | 0.760914761 | 0.005611161 |
| GPCPD1         | 3 | 1           | 0.754677755 | 0.00577443  |
| NCOA6          | 3 | 1           | 0.758316008 | 0.005815207 |
| GSTZ1          | 3 | 1           | 0.741164241 | 0.006007186 |
| ACSM4          | 3 | 0.981517263 | 0.772349272 | 0.006199857 |
| TGIF1          | 3 | 1           | 0.733887734 | 0.006200937 |
| ANGEL2         | 3 | 1           | 0.755717256 | 0.00621796  |
| AC016722.3     | 3 | 1           | 0.79002079  | 0.006473833 |
| EMILIN2        | 3 | 1           | 0.76039501  | 0.007197046 |
| RBM48          | 3 | 1           | 0.765072765 | 0.00730544  |
| TMEM39A        | 3 | 1           | 0.749480249 | 0.007501955 |
| MAN2B2         | 3 | 1           | 0.778066528 | 0.007785881 |
| RP11-484L7.2   | 3 | 1           | 0.716735967 | 0.008032668 |
| POMT2          | 3 | 1           | 0.754677755 | 0.008061489 |
| FGF5           | 3 | 0.702211112 | 0.837837838 | 0.008185428 |
| AC003102.1     | 3 | 1           | 0.826923077 | 0.008586052 |
| AC127032.2     | 3 | 1           | 0.795738046 | 0.008831541 |
| SNAPC3         | 3 | 1           | 0.748960499 | 0.008855329 |
| STAM2          | 3 | 0.591842904 | 0.846153846 | 0.008944448 |
| FAM193A        | 3 | 1           | 0.773388773 | 0.009637212 |
| RP11-1042B17.3 | 3 | 1           | 0.751039501 | 0.010696514 |
| NRP2           | 3 | 1           | 0.811850312 | 0.010955776 |
| LIN54          | 3 | 1           | 0.77962578  | 0.011060737 |
| MTMR3          | 3 | 1           | 0.76039501  | 0.011229293 |
| SFSWAP         | 3 | 1           | 0.748440748 | 0.011542605 |
| AAK1           | 3 | 1           | 0.803014553 | 0.012037383 |
| STXBP3         | 3 | 1           | 0.691787942 | 0.012236478 |
| SAMD8          | 3 | 1           | 0.806652807 | 0.012921469 |
| NBPF10         | 3 | 1           | 0.654365904 | 0.013274308 |
| EMC1           | 3 | 1           | 0.74012474  | 0.013601167 |
| TMEM126B       | 3 | 1           | 0.753118503 | 0.01377912  |
| ALAS1          | 3 | 1           | 0.753638254 | 0.013931534 |
| KIF3B          | 3 | 1           | 0.811330561 | 0.013984046 |



|               |   |             |             |             |
|---------------|---|-------------|-------------|-------------|
| TMEM66        | 3 | 1           | 0.753118503 | 0.014319676 |
| PICALM        | 3 | 1           | 0.735446985 | 0.014665135 |
| ARPC4         | 3 | 1           | 0.712058212 | 0.015779199 |
| THUMPD2       | 3 | 1           | 0.765592516 | 0.016542698 |
| CTC-467M3.1   | 3 | 1           | 0.795738046 | 0.016704595 |
| PMF1          | 3 | 1           | 0.775467775 | 0.016916614 |
| DISC1         | 3 | 1           | 0.742723493 | 0.017144759 |
| COPA          | 3 | 1           | 0.726091476 | 0.017479117 |
| RP11-453N18.1 | 3 | 1           | 0.765592516 | 0.017812892 |
| FKSG62        | 3 | 1           | 0.778586279 | 0.019365356 |
| RINL          | 3 | 1           | 0.759355509 | 0.022930803 |
| CYTH2         | 3 | 1           | 0.756237006 | 0.023303425 |
| HGSNAT        | 3 | 0.025082611 | 0.90956341  | 0.023566548 |
| ZNF493        | 3 | 1           | 0.807172557 | 0.023877652 |
| IMMP1L        | 3 | 1           | 0.824324324 | 0.024328596 |
| TAOK3         | 3 | 1           | 0.751039501 | 0.025233836 |
| CD69          | 3 | 1           | 0.735446985 | 0.02590992  |
| DUSP10        | 3 | 1           | 0.731808732 | 0.026117983 |
| RP11-706O15.3 | 3 | 1           | 0.732848233 | 0.026597434 |
| RP11-56N19.5  | 3 | 1           | 0.796777547 | 0.027364116 |
| TMEM236       | 3 | 1           | 0.820686071 | 0.027531949 |
| MKRN1         | 3 | 1           | 0.833160083 | 0.027542385 |
| AHSA2         | 3 | 1           | 0.81029106  | 0.028262687 |
| C14orf182     | 3 | 1           | 0.77962578  | 0.028380365 |
| CYB5R3        | 3 | 1           | 0.738045738 | 0.029180161 |
| GUSBP3        | 3 | 1           | 0.730769231 | 0.029253953 |
| RNF14         | 3 | 1           | 0.777546778 | 0.030497881 |
| MED15         | 3 | 1           | 0.814968815 | 0.030803324 |
| PMPCB         | 3 | 1           | 0.73960499  | 0.031198815 |
| RTF1          | 3 | 1           | 0.737525988 | 0.031198815 |
| RP4-724E16.2  | 3 | 1           | 0.776507277 | 0.031628958 |
| ATXN3         | 3 | 1           | 0.681912682 | 0.032706813 |
| AC103965.1    | 3 | 1           | 0.769230769 | 0.03286296  |
| RPS6KB1       | 3 | 1           | 0.73960499  | 0.034448698 |

|               |   |             |             |                          |
|---------------|---|-------------|-------------|--------------------------|
| ATP9B         | 3 | 1           | 0.781185031 | 0.034561402              |
| SEC22B        | 3 | 1           | 0.814968815 | 0.034986489              |
| SPAG4         | 3 | 1           | 0.737006237 | 0.036848925              |
| DCAF11        | 3 | 1           | 0.782224532 | 0.036976647              |
| SLC30A2       | 3 | 1           | 0.79002079  | 0.03702286               |
| UBE2E2        | 3 | 1           | 0.784303534 | 0.037495553              |
| ITSN2         | 3 | 1           | 0.786382536 | 0.039004082              |
| RBM22P2       | 3 | 1           | 0.748440748 | 0.040967723              |
| ACTR3C        | 3 | 1           | 0.818607069 | 0.041353828              |
| POLR1C        | 3 | 1           | 0.745841996 | 0.041917374              |
| ADH1B         | 3 | 0.342067358 | 0.826403326 | 0.043886808              |
| TRNAU1AP      | 3 | 1           | 0.72972973  | 0.044629406              |
| PGBD1         | 3 | 1           | 0.704781705 | 0.044799461              |
| PNPLA3        | 3 | 1           | 0.786382536 | 0.045417158              |
| SCAND2P       | 3 | 1           | 0.737006237 | 0.046087108              |
| SYF2          | 3 | 1           | 0.736486486 | 0.047500349              |
| SEPT11        | 3 | 1           | 0.753118503 | 0.048244982              |
| CRIP2         | 5 | 1           | 0.880952381 | 2.02029x10 <sup>-9</sup> |
| ELMSAN1       | 5 | 1           | 0.932539683 | 1.07508x10 <sup>-8</sup> |
| RP4-798C17.6  | 5 | 1           | 0.992063492 | 1.91703x10 <sup>-8</sup> |
| PON2          | 5 | 1           | 0.829365079 | 3.07267x10 <sup>-8</sup> |
| MS4A10        | 5 | 1           | 0.968253968 | 3.31463x10 <sup>-8</sup> |
| AAED1         | 5 | 1           | 0.924603175 | 3.37371x10 <sup>-8</sup> |
| DPY19L2       | 5 | 1           | 0.952380952 | 5.32347x10 <sup>-8</sup> |
| NCAM1         | 5 | 1           | 0.839285714 | 7.17877x10 <sup>-8</sup> |
| VIM           | 5 | 1           | 0.928571429 | 9.82768x10 <sup>-8</sup> |
| RP11-723D22.3 | 5 | 1           | 0.992063492 | 1.41384x10 <sup>-7</sup> |
| RP3-499B10.3  | 5 | 1           | 0.896825397 | 2.33544x10 <sup>-7</sup> |
| FOKK1         | 5 | 1           | 0.984126984 | 5.56477x10 <sup>-7</sup> |
| TP53INP1      | 5 | 1           | 0.817460317 | 5.89858x10 <sup>-7</sup> |
| NFKB2         | 5 | 1           | 0.851190476 | 7.46472x10 <sup>-7</sup> |
| RP11-820K3.2  | 5 | 1           | 0.996031746 | 8.08851x10 <sup>-7</sup> |
| LMNA          | 5 | 1           | 0.880952381 | 9.71145x10 <sup>-7</sup> |
| CCDC57        | 5 | 1           | 0.823412698 | 1.38909x10 <sup>-6</sup> |

|               |   |   |             |                          |
|---------------|---|---|-------------|--------------------------|
| PRELID2       | 5 | 1 | 0.896825397 | 1.47572x10 <sup>-6</sup> |
| ZNHIT1        | 5 | 1 | 0.920634921 | 1.4988x10 <sup>-6</sup>  |
| CASP3         | 5 | 1 | 0.807539683 | 1.5132x10 <sup>-6</sup>  |
| TPH1          | 5 | 1 | 0.972222222 | 1.6906x10 <sup>-6</sup>  |
| FRY           | 5 | 1 | 0.841269841 | 1.92844x10 <sup>-6</sup> |
| FBXL18        | 5 | 1 | 0.936507937 | 2.04092x10 <sup>-6</sup> |
| FUT8          | 5 | 1 | 0.98015873  | 2.07834x10 <sup>-6</sup> |
| SYT12         | 5 | 1 | 0.978174603 | 2.09682x10 <sup>-6</sup> |
| EFCAB12       | 5 | 1 | 0.936507937 | 2.13246x10 <sup>-6</sup> |
| IDH2          | 5 | 1 | 0.976190476 | 2.23723x10 <sup>-6</sup> |
| CCM2          | 5 | 1 | 0.837301587 | 2.25277x10 <sup>-6</sup> |
| P2RX4         | 5 | 1 | 0.94047619  | 2.83056x10 <sup>-6</sup> |
| CATSPERD      | 5 | 1 | 0.964285714 | 2.97385x10 <sup>-6</sup> |
| TUBA1B        | 5 | 1 | 0.777777778 | 3.07872x10 <sup>-6</sup> |
| VAT1          | 5 | 1 | 0.861111111 | 3.95244x10 <sup>-6</sup> |
| TUBA1A        | 5 | 1 | 0.928571429 | 4.36694x10 <sup>-6</sup> |
| AL353671.2    | 5 | 1 | 0.976190476 | 5.1951x10 <sup>-6</sup>  |
| TES           | 5 | 1 | 0.888888889 | 5.58407x10 <sup>-6</sup> |
| NUSAP1        | 5 | 1 | 0.896825397 | 5.68106x10 <sup>-6</sup> |
| AC000367.1    | 5 | 1 | 0.813492063 | 6.57868x10 <sup>-6</sup> |
| CCL5          | 5 | 1 | 0.96031746  | 7.49876x10 <sup>-6</sup> |
| TPK1          | 5 | 1 | 0.888888889 | 7.73191x10 <sup>-6</sup> |
| RP11-417J8.6  | 5 | 1 | 0.928571429 | 8.95434x10 <sup>-6</sup> |
| AGAP10        | 5 | 1 | 0.904761905 | 9.51915x10 <sup>-6</sup> |
| DIAPH1        | 5 | 1 | 0.744047619 | 1.14274x10 <sup>-5</sup> |
| GPR82         | 5 | 1 | 1           | 1.19548x10 <sup>-5</sup> |
| RP11-136F16.1 | 5 | 1 | 0.98015873  | 1.22144x10 <sup>-5</sup> |
| F2R           | 5 | 1 | 0.972222222 | 1.26947x10 <sup>-5</sup> |
| ATXN7         | 5 | 1 | 0.861111111 | 1.2873x10 <sup>-5</sup>  |
| RUFY3         | 5 | 1 | 0.845238095 | 1.31527x10 <sup>-5</sup> |
| RP11-617J18.1 | 5 | 1 | 0.873015873 | 1.42234x10 <sup>-5</sup> |
| NCOA3         | 5 | 1 | 0.827380952 | 1.42653x10 <sup>-5</sup> |
| RNF122        | 5 | 1 | 0.936507937 | 1.4834x10 <sup>-5</sup>  |
| FCRL2         | 5 | 1 | 0.932539683 | 1.50422x10 <sup>-5</sup> |

|               |   |   |             |                          |
|---------------|---|---|-------------|--------------------------|
| SLFN12L       | 5 | 1 | 0.880952381 | 1.50609x10 <sup>-5</sup> |
| DIS3L         | 5 | 1 | 0.873015873 | 1.51425x10 <sup>-5</sup> |
| GINS4         | 5 | 1 | 0.779761905 | 1.51653x10 <sup>-5</sup> |
| NEDD9         | 5 | 1 | 0.936507937 | 1.52548x10 <sup>-5</sup> |
| ALDH8A1       | 5 | 1 | 0.867063492 | 1.56841x10 <sup>-5</sup> |
| DENND5A       | 5 | 1 | 0.803571429 | 1.60017x10 <sup>-5</sup> |
| RP13-130D24.1 | 5 | 1 | 0.904761905 | 1.60986x10 <sup>-5</sup> |
| CASP10        | 5 | 1 | 0.793650794 | 1.65367x10 <sup>-5</sup> |
| EIF5A         | 5 | 1 | 0.755952381 | 1.67872x10 <sup>-5</sup> |
| RPS19P3       | 5 | 1 | 0.827380952 | 1.72846x10 <sup>-5</sup> |
| MKI67         | 5 | 1 | 0.884920635 | 1.78059x10 <sup>-5</sup> |
| PDLIM5        | 5 | 1 | 0.972222222 | 1.92228x10 <sup>-5</sup> |
| LRRN3         | 5 | 1 | 0.841269841 | 2.08205x10 <sup>-5</sup> |
| IQGAP3        | 5 | 1 | 0.829365079 | 2.18639x10 <sup>-5</sup> |
| GTF2IRD2B     | 5 | 1 | 0.904761905 | 2.19667x10 <sup>-5</sup> |
| ZNF793        | 5 | 1 | 0.853174603 | 2.25293x10 <sup>-5</sup> |
| ALCAM         | 5 | 1 | 0.799603175 | 2.26193x10 <sup>-5</sup> |
| SLC5A4        | 5 | 1 | 0.793650794 | 2.57831x10 <sup>-5</sup> |
| PTPN4         | 5 | 1 | 0.863095238 | 2.83149x10 <sup>-5</sup> |
| NPEPPS        | 5 | 1 | 0.85515873  | 2.85162x10 <sup>-5</sup> |
| S1PR3         | 5 | 1 | 0.976190476 | 2.91288x10 <sup>-5</sup> |
| CHFR          | 5 | 1 | 0.841269841 | 2.92149x10 <sup>-5</sup> |
| MLF1IP        | 5 | 1 | 0.817460317 | 2.96837x10 <sup>-5</sup> |
| PHACTR2       | 5 | 1 | 0.833333333 | 3.09998x10 <sup>-5</sup> |
| MGST2         | 5 | 1 | 0.956349206 | 3.27418x10 <sup>-5</sup> |
| MFAP3         | 5 | 1 | 0.956349206 | 3.30864x10 <sup>-5</sup> |
| RP11-168O16.1 | 5 | 1 | 0.803571429 | 3.36928x10 <sup>-5</sup> |
| AC092933.4    | 5 | 1 | 0.948412698 | 3.40107x10 <sup>-5</sup> |
| STIL          | 5 | 1 | 0.861111111 | 3.41317x10 <sup>-5</sup> |
| ITM2A         | 5 | 1 | 0.781746032 | 3.54948x10 <sup>-5</sup> |
| AL353898.2    | 5 | 1 | 0.956349206 | 3.56465x10 <sup>-5</sup> |
| KCNV1         | 5 | 1 | 0.944444444 | 3.56782x10 <sup>-5</sup> |
| PHACTR4       | 5 | 1 | 0.878968254 | 3.75272x10 <sup>-5</sup> |
| CD82          | 5 | 1 | 0.93452381  | 3.90293x10 <sup>-5</sup> |

|              |   |   |             |                          |
|--------------|---|---|-------------|--------------------------|
| AKR1B15      | 5 | 1 | 0.912698413 | 4.23523x10 <sup>-5</sup> |
| GUSB         | 5 | 1 | 0.880952381 | 4.31152x10 <sup>-5</sup> |
| USP53        | 5 | 1 | 0.912698413 | 4.39534x10 <sup>-5</sup> |
| EIF1AD       | 5 | 1 | 0.871031746 | 4.5424x10 <sup>-5</sup>  |
| CORO2A       | 5 | 1 | 0.944444444 | 4.62159x10 <sup>-5</sup> |
| UBXN2A       | 5 | 1 | 0.944444444 | 4.65034x10 <sup>-5</sup> |
| AL139147.1   | 5 | 1 | 0.847222222 | 4.67041x10 <sup>-5</sup> |
| POLE         | 5 | 1 | 0.972222222 | 4.70101x10 <sup>-5</sup> |
| ILKAP        | 5 | 1 | 0.859126984 | 4.76131x10 <sup>-5</sup> |
| CDCA8        | 5 | 1 | 0.807539683 | 4.97324x10 <sup>-5</sup> |
| CKS1B        | 5 | 1 | 0.972222222 | 5.20704x10 <sup>-5</sup> |
| CSF2RA       | 5 | 1 | 0.928571429 | 5.28147x10 <sup>-5</sup> |
| HMGCR        | 5 | 1 | 0.875       | 5.47843x10 <sup>-5</sup> |
| CLEC7A       | 5 | 1 | 0.96031746  | 5.51904x10 <sup>-5</sup> |
| CD44         | 5 | 1 | 0.857142857 | 5.5568x10 <sup>-5</sup>  |
| CACNA1D      | 5 | 1 | 0.96031746  | 5.59835x10 <sup>-5</sup> |
| KCNE3        | 5 | 1 | 0.845238095 | 5.60674x10 <sup>-5</sup> |
| TUBB         | 5 | 1 | 0.964285714 | 5.72046x10 <sup>-5</sup> |
| AC002472.13  | 5 | 1 | 0.938492063 | 5.84193x10 <sup>-5</sup> |
| STON1        | 5 | 1 | 0.970238095 | 6.02989x10 <sup>-5</sup> |
| ANP32B       | 5 | 1 | 0.873015873 | 6.15545x10 <sup>-5</sup> |
| YARS         | 5 | 1 | 0.94047619  | 6.37101x10 <sup>-5</sup> |
| PDHB         | 5 | 1 | 0.744047619 | 6.43141x10 <sup>-5</sup> |
| DHX15        | 5 | 1 | 0.753968254 | 6.63984x10 <sup>-5</sup> |
| ASCC1        | 5 | 1 | 0.857142857 | 6.7262x10 <sup>-5</sup>  |
| PTCHD1       | 5 | 1 | 0.841269841 | 6.81517x10 <sup>-5</sup> |
| SCLY         | 5 | 1 | 0.875       | 6.89683x10 <sup>-5</sup> |
| LIMK1        | 5 | 1 | 0.950396825 | 6.94073x10 <sup>-5</sup> |
| DHFR         | 5 | 1 | 0.831349206 | 6.96603x10 <sup>-5</sup> |
| NUP98        | 5 | 1 | 0.813492063 | 7.2627x10 <sup>-5</sup>  |
| ACTR3B       | 5 | 1 | 0.928571429 | 7.37909x10 <sup>-5</sup> |
| CDC42        | 5 | 1 | 0.908730159 | 7.43407x10 <sup>-5</sup> |
| CTD-2017C7.1 | 5 | 1 | 0.952380952 | 7.69865x10 <sup>-5</sup> |
| USP9X        | 5 | 1 | 0.80952381  | 7.84697x10 <sup>-5</sup> |

|                 |   |   |             |                          |
|-----------------|---|---|-------------|--------------------------|
| CCZ1B           | 5 | 1 | 0.813492063 | 8.0489x10 <sup>-5</sup>  |
| CYP17A1         | 5 | 1 | 0.932539683 | 8.1x10 <sup>-5</sup>     |
| ENSG00000253984 | 5 | 1 | 0.936507937 | 8.19238x10 <sup>-5</sup> |
| RP11-162D9.3    | 5 | 1 | 1           | 8.24539x10 <sup>-5</sup> |
| IVD             | 5 | 1 | 0.807539683 | 8.7481x10 <sup>-5</sup>  |
| PRKX            | 5 | 1 | 0.819444444 | 8.79507x10 <sup>-5</sup> |
| HIP1            | 5 | 1 | 0.797619048 | 8.96357x10 <sup>-5</sup> |
| RP11-44M6.3     | 5 | 1 | 0.892857143 | 8.98026x10 <sup>-5</sup> |
| CCDC88B         | 5 | 1 | 0.958333333 | 9.02635x10 <sup>-5</sup> |
| PFN1            | 5 | 1 | 0.976190476 | 9.68894x10 <sup>-5</sup> |
| SLC11A1         | 5 | 1 | 0.853174603 | 9.82647x10 <sup>-5</sup> |
| TRAPPC2         | 5 | 1 | 0.972222222 | 0.000102522              |
| KLF8            | 5 | 1 | 0.896825397 | 0.000105707              |
| RP11-34P13.13   | 5 | 1 | 0.962301587 | 0.000110782              |
| PROSER1         | 5 | 1 | 0.869047619 | 0.000113309              |
| MYH9            | 5 | 1 | 0.785714286 | 0.000113439              |
| ITGA5           | 5 | 1 | 0.841269841 | 0.000113467              |
| C4BPB           | 5 | 1 | 1           | 0.000117354              |
| RAB11FIP4       | 5 | 1 | 0.890873016 | 0.000120235              |
| LIX1L           | 5 | 1 | 0.821428571 | 0.000126652              |
| NUP43           | 5 | 1 | 0.83531746  | 0.000126796              |
| WIPF2           | 5 | 1 | 0.94047619  | 0.000130196              |
| RP11-130C19.3   | 5 | 1 | 0.817460317 | 0.000133227              |
| CRX             | 5 | 1 | 0.896825397 | 0.000134962              |
| CLRN1-AS1       | 5 | 1 | 0.890873016 | 0.000138242              |
| HBP1            | 5 | 1 | 0.76984127  | 0.000138775              |
| SSBP2           | 5 | 1 | 0.728174603 | 0.000138934              |
| NR2C2           | 5 | 1 | 0.777777778 | 0.000139947              |
| FMO5            | 5 | 1 | 0.888888889 | 0.000140357              |
| BRCA2           | 5 | 1 | 0.821428571 | 0.000140461              |
| RP11-735B13.1   | 5 | 1 | 0.801587302 | 0.000145701              |
| WWTR1           | 5 | 1 | 0.890873016 | 0.000147523              |
| CD97            | 5 | 1 | 0.984126984 | 0.000149017              |
| RP13-452N2.1    | 5 | 1 | 0.829365079 | 0.000157252              |

|               |   |             |             |             |
|---------------|---|-------------|-------------|-------------|
| EXOSC10       | 5 | 1           | 0.849206349 | 0.000159954 |
| EPS15         | 5 | 1           | 0.777777778 | 0.000167741 |
| RAP2B         | 5 | 1           | 0.821428571 | 0.000168063 |
| SGK1          | 5 | 1           | 0.906746032 | 0.000170998 |
| GTF2IRD2      | 5 | 1           | 0.932539683 | 0.000171126 |
| SLC26A4       | 5 | 1           | 0.736111111 | 0.00017172  |
| SFXN3         | 5 | 1           | 0.982142857 | 0.000172296 |
| C9orf147      | 5 | 1           | 0.948412698 | 0.000173216 |
| TULP4         | 5 | 1           | 0.837301587 | 0.000174837 |
| RP11-229P13.2 | 5 | 1           | 0.906746032 | 0.000176612 |
| ZBTB43        | 5 | 1           | 0.785714286 | 0.000176618 |
| OR7D2         | 5 | 1           | 0.956349206 | 0.000179351 |
| KCNK3         | 5 | 1           | 0.892857143 | 0.000186503 |
| ANPEP         | 5 | 1           | 0.83531746  | 0.00018795  |
| APOBEC3F      | 5 | 1           | 0.898809524 | 0.000188939 |
| UBE2C         | 5 | 1           | 0.875       | 0.000189353 |
| RBM23         | 5 | 1           | 0.884920635 | 0.000189562 |
| SHQ1          | 5 | 1           | 0.859126984 | 0.000191719 |
| ZNF410        | 5 | 1           | 0.76984127  | 0.000191802 |
| LETM2         | 5 | 1           | 0.882936508 | 0.000194928 |
| COCH          | 5 | 1           | 0.900793651 | 0.000197306 |
| SLC34A2       | 5 | 1           | 0.902777778 | 0.000211517 |
| PPIL3         | 5 | 1           | 0.873015873 | 0.000214713 |
| CNOT8         | 5 | 1           | 0.785714286 | 0.00023124  |
| GOLM1         | 5 | 1           | 0.827380952 | 0.000237764 |
| WEE1          | 5 | 1           | 0.833333333 | 0.000242759 |
| TMEM192       | 5 | 1           | 0.827380952 | 0.000257982 |
| CTC-497E21.4  | 5 | 1           | 0.755952381 | 0.000258581 |
| USP54         | 5 | 1           | 0.878968254 | 0.000259764 |
| RP11-46H11.2  | 5 | 0.001781895 | 0.978174603 | 0.000261254 |
| NPLOC4        | 5 | 1           | 0.829365079 | 0.00026502  |
| NPAPI         | 5 | 1           | 0.819444444 | 0.000270449 |
| BACH1         | 5 | 1           | 0.78968254  | 0.000274611 |
| SPECC1        | 5 | 1           | 0.884920635 | 0.000280233 |

|            |   |   |             |             |
|------------|---|---|-------------|-------------|
| AC097382.5 | 5 | 1 | 0.871031746 | 0.000283686 |
| RANGAP1    | 5 | 1 | 0.867063492 | 0.000284401 |
| KREMEN1    | 5 | 1 | 0.916666667 | 0.000290402 |
| CYFIP2     | 5 | 1 | 0.811507937 | 0.000292235 |
| LTBP3      | 5 | 1 | 0.958333333 | 0.000296136 |
| WDR76      | 5 | 1 | 0.827380952 | 0.0002976   |
| KIAA1377   | 5 | 1 | 0.93452381  | 0.000297679 |
| FAM201B    | 5 | 1 | 0.996031746 | 0.000299307 |
| GCNT2      | 5 | 1 | 0.968253968 | 0.0002996   |
| MCM4       | 5 | 1 | 0.785714286 | 0.000306015 |
| PTPRG-AS1  | 5 | 1 | 0.849206349 | 0.000311472 |
| MUC20      | 5 | 1 | 0.821428571 | 0.000313009 |
| EDEM2      | 5 | 1 | 0.811507937 | 0.000313373 |
| CSNK1A1    | 5 | 1 | 0.78968254  | 0.000314986 |
| CBR3-AS1   | 5 | 1 | 0.976190476 | 0.000327165 |
| SLC14A1    | 5 | 1 | 0.902777778 | 0.00032924  |
| SLIRP      | 5 | 1 | 0.801587302 | 0.000336931 |
| ACER3      | 5 | 1 | 0.930555556 | 0.000343877 |
| TNK2       | 5 | 1 | 0.853174603 | 0.000345561 |
| PARK2      | 5 | 1 | 0.942460317 | 0.000347702 |
| CERS5      | 5 | 1 | 0.795634921 | 0.00035353  |
| KRAS       | 5 | 1 | 0.880952381 | 0.000366831 |
| KPNA2      | 5 | 1 | 0.817460317 | 0.000375391 |
| ZNF969P    | 5 | 1 | 0.880952381 | 0.000383448 |
| IGF2BP1    | 5 | 1 | 0.916666667 | 0.00038397  |
| GSTO2      | 5 | 1 | 1           | 0.000386235 |
| SPDYE2     | 5 | 1 | 0.753968254 | 0.000386413 |
| POLA2      | 5 | 1 | 0.857142857 | 0.000387552 |
| TCOF1      | 5 | 1 | 0.930555556 | 0.000387643 |
| RAB33B     | 5 | 1 | 0.837301587 | 0.000391324 |
| EXOSC6     | 5 | 1 | 0.740079365 | 0.000392324 |
| AC005082.1 | 5 | 1 | 0.861111111 | 0.000394497 |
| LETM1      | 5 | 1 | 0.83531746  | 0.000395466 |
| UBE2B      | 5 | 1 | 0.96031746  | 0.000398932 |



|              |   |   |             |             |
|--------------|---|---|-------------|-------------|
| AC073065.3   | 5 | 1 | 0.801587302 | 0.000404478 |
| SLC30A4      | 5 | 1 | 0.869047619 | 0.000408209 |
| PDCL         | 5 | 1 | 0.876984127 | 0.000409004 |
| ERBB3        | 5 | 1 | 0.880952381 | 0.000409884 |
| MX2          | 5 | 1 | 0.847222222 | 0.00041139  |
| FBXO24       | 5 | 1 | 0.801587302 | 0.000422607 |
| ENTPD4       | 5 | 1 | 0.732142857 | 0.000425416 |
| TCEANC2      | 5 | 1 | 0.853174603 | 0.000427717 |
| RNFT2        | 5 | 1 | 0.952380952 | 0.000430213 |
| KIF21A       | 5 | 1 | 0.932539683 | 0.000437111 |
| NOS1         | 5 | 1 | 0.924603175 | 0.000438989 |
| ABL2         | 5 | 1 | 0.857142857 | 0.000440096 |
| EMC4         | 5 | 1 | 0.827380952 | 0.000443613 |
| BAG1         | 5 | 1 | 0.833333333 | 0.000444502 |
| METTL8       | 5 | 1 | 0.875       | 0.000445289 |
| NAA25        | 5 | 1 | 0.748015873 | 0.000446636 |
| SGPP2        | 5 | 1 | 0.91468254  | 0.000454903 |
| SAMSN1       | 5 | 1 | 0.767857143 | 0.000456563 |
| SLC12A2      | 5 | 1 | 0.936507937 | 0.000459699 |
| BCL10        | 5 | 1 | 0.817460317 | 0.000462023 |
| FAM227A      | 5 | 1 | 0.94047619  | 0.000470848 |
| ZNF829       | 5 | 1 | 0.890873016 | 0.000471395 |
| FZD3         | 5 | 1 | 0.938492063 | 0.000481799 |
| RPL32P3      | 5 | 1 | 0.884920635 | 0.00048802  |
| STRIP2       | 5 | 1 | 0.811507937 | 0.000490451 |
| TP53         | 5 | 1 | 0.825396825 | 0.00049127  |
| FAM177A1     | 5 | 1 | 0.785714286 | 0.000502438 |
| NCAPD2       | 5 | 1 | 0.912698413 | 0.00050816  |
| ARSB         | 5 | 1 | 0.807539683 | 0.000510281 |
| PIK3CB       | 5 | 1 | 0.876984127 | 0.00051107  |
| RP3-340B19.5 | 5 | 1 | 0.898809524 | 0.000516053 |
| ANKRD26P3    | 5 | 1 | 0.795634921 | 0.000518155 |
| DUT          | 5 | 1 | 0.892857143 | 0.00052545  |
| ZNF542       | 5 | 1 | 0.865079365 | 0.000537466 |

|              |   |   |             |             |
|--------------|---|---|-------------|-------------|
| FAM212B      | 5 | 1 | 0.869047619 | 0.00054549  |
| DSTYK        | 5 | 1 | 0.839285714 | 0.000547206 |
| KLHL6        | 5 | 1 | 0.853174603 | 0.00054776  |
| SERINC5      | 5 | 1 | 0.880952381 | 0.00055329  |
| DUSP14       | 5 | 1 | 0.781746032 | 0.000553364 |
| KIAA0101     | 5 | 1 | 0.992063492 | 0.00055438  |
| GLIPR2       | 5 | 1 | 0.849206349 | 0.000561445 |
| EPB41        | 5 | 1 | 0.859126984 | 0.000565895 |
| PRPS2        | 5 | 1 | 0.884920635 | 0.000576489 |
| TRIM65       | 5 | 1 | 0.94047619  | 0.000581376 |
| DDX52        | 5 | 1 | 0.924603175 | 0.000581686 |
| FAM134C      | 5 | 1 | 0.859126984 | 0.000593102 |
| KIF1C        | 5 | 1 | 0.876984127 | 0.000597722 |
| IPO9         | 5 | 1 | 0.765873016 | 0.000598815 |
| ZNF568       | 5 | 1 | 0.924603175 | 0.000604    |
| ZNF445       | 5 | 1 | 0.837301587 | 0.00061184  |
| ZNF562       | 5 | 1 | 0.78968254  | 0.000613255 |
| DIS3         | 5 | 1 | 0.751984127 | 0.000616873 |
| CCDC150      | 5 | 1 | 0.93452381  | 0.000620912 |
| CYP20A1      | 5 | 1 | 0.863095238 | 0.000621108 |
| GPLD1        | 5 | 1 | 0.805555556 | 0.000628012 |
| WARS2-IT1    | 5 | 1 | 0.936507937 | 0.000635103 |
| NMT2         | 5 | 1 | 0.767857143 | 0.000649883 |
| GSDMB        | 5 | 1 | 0.952380952 | 0.00065251  |
| NMNAT1       | 5 | 1 | 0.912698413 | 0.000660313 |
| DHX32        | 5 | 1 | 0.767857143 | 0.00066543  |
| MCM8         | 5 | 1 | 0.825396825 | 0.000679832 |
| ZNF713       | 5 | 1 | 0.876984127 | 0.000683751 |
| SERPINB9     | 5 | 1 | 0.785714286 | 0.000698218 |
| ASPM         | 5 | 1 | 0.80952381  | 0.000703777 |
| TMEM41A      | 5 | 1 | 0.728174603 | 0.000715627 |
| RP11-423H2.3 | 5 | 1 | 0.952380952 | 0.000731486 |
| FER1L5       | 5 | 1 | 0.916666667 | 0.000734381 |
| PGM3         | 5 | 1 | 0.890873016 | 0.000736165 |

|               |   |   |             |             |
|---------------|---|---|-------------|-------------|
| GOLIM4        | 5 | 1 | 0.857142857 | 0.00078118  |
| ARSG          | 5 | 1 | 0.880952381 | 0.000785329 |
| AL353671.4    | 5 | 1 | 0.920634921 | 0.000788046 |
| CD151         | 5 | 1 | 0.988095238 | 0.00079487  |
| CTC-436P18.3  | 5 | 1 | 0.890873016 | 0.000802996 |
| C15orf57      | 5 | 1 | 0.873015873 | 0.000812703 |
| SH3BGRL3      | 5 | 1 | 0.857142857 | 0.000826085 |
| IYD           | 5 | 1 | 0.964285714 | 0.000836577 |
| RBMS1         | 5 | 1 | 0.886904762 | 0.000840987 |
| AC005003.1    | 5 | 1 | 0.902777778 | 0.000844295 |
| RP11-111M22.2 | 5 | 1 | 0.964285714 | 0.000845496 |
| ACOT11        | 5 | 1 | 0.85515873  | 0.000861852 |
| KIR3DX1       | 5 | 1 | 0.797619048 | 0.00086879  |
| PRRG4         | 5 | 1 | 0.926587302 | 0.000871505 |
| RP11-573D15.2 | 5 | 1 | 0.928571429 | 0.000878705 |
| SERINC1       | 5 | 1 | 0.880952381 | 0.000883204 |
| AARD          | 5 | 1 | 0.94047619  | 0.000886992 |
| KLHL24        | 5 | 1 | 0.793650794 | 0.000901076 |
| LRRC2         | 5 | 1 | 0.833333333 | 0.000910515 |
| NAGK          | 5 | 1 | 0.839285714 | 0.000913131 |
| NHLRC3        | 5 | 1 | 0.839285714 | 0.000917146 |
| KIF11         | 5 | 1 | 0.80952381  | 0.000917296 |
| AL162389.1    | 5 | 1 | 0.875       | 0.00092106  |
| HLCS          | 5 | 1 | 0.763888889 | 0.000959049 |
| LGALS1        | 5 | 1 | 0.869047619 | 0.000959918 |
| TMEM120B      | 5 | 1 | 0.793650794 | 0.000966954 |
| ZADH2         | 5 | 1 | 0.878968254 | 0.000973149 |
| RPA2          | 5 | 1 | 0.714285714 | 0.000978305 |
| DSG3          | 5 | 1 | 0.984126984 | 0.000981703 |
| SUMF2         | 5 | 1 | 0.787698413 | 0.000991134 |
| CYP51A1       | 5 | 1 | 0.847222222 | 0.000993545 |
| KIF6          | 5 | 1 | 0.898809524 | 0.000997708 |
| AFTPH         | 5 | 1 | 0.837301587 | 0.001007037 |
| ST8SIA1       | 5 | 1 | 0.916666667 | 0.001025038 |

|                |   |   |             |             |
|----------------|---|---|-------------|-------------|
| ANKLE1         | 5 | 1 | 0.968253968 | 0.001025843 |
| AC016907.3     | 5 | 1 | 0.803571429 | 0.00102806  |
| FOXN3          | 5 | 1 | 0.954365079 | 0.001030217 |
| RNGTT          | 5 | 1 | 0.724206349 | 0.001049271 |
| HPGDS          | 5 | 1 | 0.833333333 | 0.001050646 |
| SLC48A1        | 5 | 1 | 0.861111111 | 0.00105858  |
| OLA1P3         | 5 | 1 | 0.91468254  | 0.001064593 |
| FBXO9          | 5 | 1 | 0.926587302 | 0.001067584 |
| CDKL1          | 5 | 1 | 0.900793651 | 0.001067778 |
| UEVLD          | 5 | 1 | 0.876984127 | 0.00107345  |
| DIAPH3         | 5 | 1 | 0.912698413 | 0.001089419 |
| ALG12          | 5 | 1 | 0.748015873 | 0.001089496 |
| DDHD2          | 5 | 1 | 0.76984127  | 0.001090492 |
| RP11-57H12.3   | 5 | 1 | 0.992063492 | 0.00109513  |
| LIMS1          | 5 | 1 | 0.837301587 | 0.001101552 |
| SNHG14         | 5 | 1 | 0.996031746 | 0.001102549 |
| AC027269.2     | 5 | 1 | 0.876984127 | 0.001107588 |
| RP11-382J12.1  | 5 | 1 | 0.757936508 | 0.001108269 |
| EVI5           | 5 | 1 | 0.904761905 | 0.001111553 |
| PIP4K2C        | 5 | 1 | 0.805555556 | 0.001130947 |
| YES1           | 5 | 1 | 0.952380952 | 0.001136504 |
| LONRF2         | 5 | 1 | 0.910714286 | 0.001144336 |
| LAT2           | 5 | 1 | 0.827380952 | 0.001153167 |
| RUNDC1         | 5 | 1 | 0.839285714 | 0.001154381 |
| ZNF677         | 5 | 1 | 0.91468254  | 0.001159959 |
| IRF9           | 5 | 1 | 0.76984127  | 0.001162352 |
| HCAR1          | 5 | 1 | 0.757936508 | 0.00118698  |
| ANAPC15        | 5 | 1 | 0.765873016 | 0.001210423 |
| DKFZP686J19100 | 5 | 1 | 0.944444444 | 0.0012217   |
| ZDHHC15        | 5 | 1 | 0.859126984 | 0.001230297 |
| AC007308.6     | 5 | 1 | 0.904761905 | 0.001247702 |
| TMBIM1         | 5 | 1 | 0.956349206 | 0.001249296 |
| DNASE1L3       | 5 | 1 | 0.988095238 | 0.001263192 |
| CACNA2D1       | 5 | 1 | 0.996031746 | 0.001269661 |

|               |   |   |             |             |
|---------------|---|---|-------------|-------------|
| GALNTL5       | 5 | 1 | 0.968253968 | 0.001283732 |
| DEC1          | 5 | 1 | 0.801587302 | 0.001310461 |
| GPR132        | 5 | 1 | 0.882936508 | 0.001329536 |
| SYT11         | 5 | 1 | 0.89484127  | 0.001334727 |
| BRAF          | 5 | 1 | 0.880952381 | 0.001338959 |
| UBAP2L        | 5 | 1 | 0.793650794 | 0.001342942 |
| L3MBTL4       | 5 | 1 | 0.91468254  | 0.001343277 |
| ZNF2          | 5 | 1 | 0.849206349 | 0.00134402  |
| OSBPL9        | 5 | 1 | 0.817460317 | 0.001344806 |
| MPP7          | 5 | 1 | 0.900793651 | 0.001345919 |
| PARVA         | 5 | 1 | 0.958333333 | 0.001347261 |
| POM121L10P    | 5 | 1 | 0.759920635 | 0.001367044 |
| LUC7L         | 5 | 1 | 0.738095238 | 0.00137082  |
| HUNK          | 5 | 1 | 0.926587302 | 0.001377889 |
| OSBPL2        | 5 | 1 | 0.759920635 | 0.001377889 |
| PRICKLE2-AS3  | 5 | 1 | 0.875       | 0.001409068 |
| TRIM58        | 5 | 1 | 0.861111111 | 0.001431596 |
| RP11-375F2.2  | 5 | 1 | 0.910714286 | 0.001441412 |
| AF127577.8    | 5 | 1 | 0.896825397 | 0.001453481 |
| TMEM220       | 5 | 1 | 0.759920635 | 0.001476128 |
| ACSL6         | 5 | 1 | 0.952380952 | 0.001483993 |
| RP5-1021I20.5 | 5 | 1 | 0.811507937 | 0.0014908   |
| RP11-149I23.3 | 5 | 1 | 0.976190476 | 0.001506948 |
| RP11-983P16.4 | 5 | 1 | 0.958333333 | 0.001528515 |
| TEP1          | 5 | 1 | 0.763888889 | 0.00152995  |
| LAPTM4B       | 5 | 1 | 0.795634921 | 0.001554445 |
| PRR11         | 5 | 1 | 0.888888889 | 0.001554584 |
| GALNT10       | 5 | 1 | 0.781746032 | 0.001566485 |
| PLEKHM1P      | 5 | 1 | 0.972222222 | 0.00159024  |
| TMEM14B       | 5 | 1 | 0.847222222 | 0.001602283 |
| ACTG1P9       | 5 | 1 | 0.970238095 | 0.001603961 |
| TOP2A         | 5 | 1 | 0.700396825 | 0.001609823 |
| ZNF7          | 5 | 1 | 0.896825397 | 0.00161145  |
| UTP11L        | 5 | 1 | 0.744047619 | 0.001614852 |

|               |   |   |             |             |
|---------------|---|---|-------------|-------------|
| NWD1          | 5 | 1 | 0.922619048 | 0.001621117 |
| EZR           | 5 | 1 | 0.928571429 | 0.001627086 |
| CTD-2521M24.4 | 5 | 1 | 0.988095238 | 0.001640526 |
| PDDC1         | 5 | 1 | 0.876984127 | 0.001677885 |
| CENPF         | 5 | 1 | 0.821428571 | 0.001681474 |
| EFNA5         | 5 | 1 | 0.890873016 | 0.001689971 |
| INMT          | 5 | 1 | 0.98015873  | 0.001700539 |
| ITK           | 5 | 1 | 0.884920635 | 0.001707623 |
| PTPRC         | 5 | 1 | 0.829365079 | 0.001708857 |
| FAM179A       | 5 | 1 | 0.94047619  | 0.001717476 |
| KRT8          | 5 | 1 | 0.853174603 | 0.00172735  |
| CTD-2339L15.1 | 5 | 1 | 0.865079365 | 0.001729417 |
| TTC39C        | 5 | 1 | 0.779761905 | 0.00175111  |
| PTBP3         | 5 | 1 | 0.748015873 | 0.001756705 |
| SMC4          | 5 | 1 | 0.783730159 | 0.001772263 |
| PCDP1         | 5 | 1 | 0.936507937 | 0.001781391 |
| EXOC3L2       | 5 | 1 | 0.827380952 | 0.001788327 |
| STRC          | 5 | 1 | 0.932539683 | 0.001788327 |
| TK1           | 5 | 1 | 0.803571429 | 0.001795474 |
| ENTPD1-AS1    | 5 | 1 | 0.888888889 | 0.001799728 |
| HIST1H1B      | 5 | 1 | 0.984126984 | 0.001804388 |
| C11orf57      | 5 | 1 | 0.867063492 | 0.001813663 |
| ARMC9         | 5 | 1 | 0.942460317 | 0.001867327 |
| C2CD3         | 5 | 1 | 0.771825397 | 0.001869059 |
| NANOG         | 5 | 1 | 0.821428571 | 0.001873747 |
| KIF13A        | 5 | 1 | 0.821428571 | 0.001881508 |
| CCDC69        | 5 | 1 | 0.890873016 | 0.001892662 |
| MCM7          | 5 | 1 | 0.69047619  | 0.001897905 |
| TPMT          | 5 | 1 | 0.962301587 | 0.001908886 |
| CLK1          | 5 | 1 | 0.773809524 | 0.001911468 |
| PBX1          | 5 | 1 | 0.976190476 | 0.001937201 |
| C1orf174      | 5 | 1 | 0.837301587 | 0.00197257  |
| UNC80         | 5 | 1 | 0.968253968 | 0.001974074 |
| ZNF776        | 5 | 1 | 0.839285714 | 0.001977221 |

|               |   |   |             |             |
|---------------|---|---|-------------|-------------|
| MACC1         | 5 | 1 | 0.869047619 | 0.00200302  |
| TARDBP        | 5 | 1 | 0.904761905 | 0.002038875 |
| SMC6          | 5 | 1 | 0.853174603 | 0.002044456 |
| AC005779.1    | 5 | 1 | 0.871031746 | 0.002056468 |
| PICK1         | 5 | 1 | 0.851190476 | 0.002061943 |
| MAP3K15       | 5 | 1 | 0.906746032 | 0.002076116 |
| ZNF543        | 5 | 1 | 0.912698413 | 0.002089381 |
| RPP14         | 5 | 1 | 0.807539683 | 0.00209118  |
| MED4          | 5 | 1 | 0.763888889 | 0.002095289 |
| ITGA3         | 5 | 1 | 0.950396825 | 0.002126146 |
| CES4A         | 5 | 1 | 0.819444444 | 0.002144763 |
| CROCCP3       | 5 | 1 | 0.876984127 | 0.002145252 |
| MTND2P12      | 5 | 1 | 0.968253968 | 0.002185192 |
| TXN2          | 5 | 1 | 0.847222222 | 0.00219304  |
| PLOD3         | 5 | 1 | 0.956349206 | 0.002197485 |
| CXorf23       | 5 | 1 | 0.777777778 | 0.002215541 |
| SMIM7         | 5 | 1 | 0.936507937 | 0.002236641 |
| SLFN5         | 5 | 1 | 0.94047619  | 0.002259066 |
| FUT2          | 5 | 1 | 0.841269841 | 0.002259878 |
| BZW1          | 5 | 1 | 0.920634921 | 0.002272324 |
| HNRNPR        | 5 | 1 | 0.755952381 | 0.002313403 |
| ARL4A         | 5 | 1 | 0.847222222 | 0.002321736 |
| METTL20       | 5 | 1 | 0.94047619  | 0.002348329 |
| AC025335.1    | 5 | 1 | 0.819444444 | 0.002364613 |
| SLMAP         | 5 | 1 | 0.797619048 | 0.002389093 |
| COG8          | 5 | 1 | 0.89484127  | 0.002404215 |
| HAP1          | 5 | 1 | 0.938492063 | 0.002410865 |
| ANKRD13A      | 5 | 1 | 0.841269841 | 0.002425952 |
| CP            | 5 | 1 | 0.992063492 | 0.002434065 |
| KIAA1429      | 5 | 1 | 0.841269841 | 0.002443634 |
| FADS3         | 5 | 1 | 0.837301587 | 0.002450346 |
| RP11-568K15.1 | 5 | 1 | 0.932539683 | 0.002454442 |
| FAM115C       | 5 | 1 | 0.98015873  | 0.002458062 |
| GOLGA3        | 5 | 1 | 0.744047619 | 0.002458503 |

|               |   |   |             |             |
|---------------|---|---|-------------|-------------|
| APOL4         | 5 | 1 | 0.853174603 | 0.00247392  |
| NOL9          | 5 | 1 | 0.853174603 | 0.00248266  |
| RP5-1198O20.5 | 5 | 1 | 0.920634921 | 0.002507407 |
| GSTT1         | 5 | 1 | 0.906746032 | 0.002516499 |
| AC093415.2    | 5 | 1 | 0.811507937 | 0.002529326 |
| UPP1          | 5 | 1 | 0.763888889 | 0.002539436 |
| USHBP1        | 5 | 1 | 0.75        | 0.002545263 |
| ATF7IP        | 5 | 1 | 0.988095238 | 0.002550913 |
| AC005154.6    | 5 | 1 | 0.888888889 | 0.00256325  |
| AC090587.2    | 5 | 1 | 0.956349206 | 0.002598491 |
| VMP1          | 5 | 1 | 0.803571429 | 0.002622931 |
| FAM184B       | 5 | 1 | 0.938492063 | 0.002651765 |
| ABCB9         | 5 | 1 | 0.896825397 | 0.002684018 |
| DNAJC27-AS1   | 5 | 1 | 0.988095238 | 0.002700869 |
| RP11-90P5.5   | 5 | 1 | 0.936507937 | 0.002701949 |
| SNX22         | 5 | 1 | 0.865079365 | 0.002704682 |
| AL663093.3    | 5 | 1 | 0.906746032 | 0.002729256 |
| CR759772.1    | 5 | 1 | 0.906746032 | 0.002729256 |
| LRRC49        | 5 | 1 | 0.916666667 | 0.002739716 |
| KPNA1         | 5 | 1 | 0.742063492 | 0.002740781 |
| CTD-2368P22.1 | 5 | 1 | 0.950396825 | 0.002783987 |
| MOB1B         | 5 | 1 | 0.83531746  | 0.002832798 |
| LZTS1         | 5 | 1 | 0.827380952 | 0.002845907 |
| TOR3A         | 5 | 1 | 0.900793651 | 0.002848391 |
| KIAA0825      | 5 | 1 | 0.882936508 | 0.002850329 |
| DEGS1         | 5 | 1 | 0.779761905 | 0.002880119 |
| AC079354.1    | 5 | 1 | 0.906746032 | 0.002880573 |
| ZNF3          | 5 | 1 | 0.761904762 | 0.002887452 |
| SATL1         | 5 | 1 | 0.988095238 | 0.002890973 |
| CDV3          | 5 | 1 | 0.813492063 | 0.002907107 |
| RP11-640M9.2  | 5 | 1 | 0.988095238 | 0.00290763  |
| HNRNPH2       | 5 | 1 | 0.795634921 | 0.002914415 |
| TESK2         | 5 | 1 | 0.938492063 | 0.002972899 |
| PHLDB1        | 5 | 1 | 0.813492063 | 0.003000764 |



|               |   |             |             |             |
|---------------|---|-------------|-------------|-------------|
| MEFV          | 5 | 1           | 0.831349206 | 0.00300675  |
| USP4          | 5 | 1           | 0.757936508 | 0.003014494 |
| RP11-624L4.1  | 5 | 1           | 0.718253968 | 0.003021473 |
| SLC9A4        | 5 | 1           | 0.89484127  | 0.003028628 |
| RP11-144G7.2  | 5 | 0.001097855 | 0.986111111 | 0.003037821 |
| OSBPL10       | 5 | 1           | 0.916666667 | 0.003053499 |
| METTL12       | 5 | 1           | 0.918650794 | 0.003069747 |
| RP11-106J23.2 | 5 | 1           | 0.779761905 | 0.003071668 |
| HIST1H1E      | 5 | 1           | 0.93452381  | 0.003073136 |
| HMGXB4        | 5 | 1           | 0.753968254 | 0.003095832 |
| C12orf76      | 5 | 1           | 0.928571429 | 0.003100066 |
| RRM2          | 5 | 1           | 0.75        | 0.003102168 |
| TFIP11        | 5 | 1           | 0.765873016 | 0.003142914 |
| MAFF          | 5 | 1           | 0.865079365 | 0.003172885 |
| ZNF250        | 5 | 1           | 0.841269841 | 0.003173378 |
| RIOK2         | 5 | 1           | 0.793650794 | 0.003175123 |
| SUOX          | 5 | 1           | 0.849206349 | 0.003184599 |
| RP11-131J3.1  | 5 | 1           | 0.956349206 | 0.003184671 |
| RP11-483I13.2 | 5 | 1           | 0.956349206 | 0.003184671 |
| C11orf1       | 5 | 1           | 0.958333333 | 0.003186143 |
| AGO1          | 5 | 1           | 0.882936508 | 0.003220075 |
| RP11-531A24.5 | 5 | 1           | 0.98015873  | 0.003255422 |
| ESCO2         | 5 | 1           | 0.865079365 | 0.00330094  |
| WASF2         | 5 | 1           | 0.94047619  | 0.003320321 |
| TMEM128       | 5 | 1           | 0.984126984 | 0.003327087 |
| ZC3H7B        | 5 | 1           | 0.833333333 | 0.0033588   |
| NDUFA7        | 5 | 1           | 0.910714286 | 0.003358862 |
| MOK           | 5 | 1           | 0.853174603 | 0.003457044 |
| TSPAN31       | 5 | 1           | 0.882936508 | 0.003496778 |
| RARS          | 5 | 1           | 0.755952381 | 0.003496929 |
| TSPYL1        | 5 | 1           | 0.817460317 | 0.003515061 |
| SLC11A2       | 5 | 1           | 0.906746032 | 0.003547135 |
| TIAM1         | 5 | 1           | 0.996031746 | 0.003571364 |
| OR4A10P       | 5 | 1           | 0.926587302 | 0.003579766 |

|               |   |   |             |             |
|---------------|---|---|-------------|-------------|
| ZNF440        | 5 | 1 | 0.775793651 | 0.003582412 |
| HSCB          | 5 | 1 | 0.948412698 | 0.003594644 |
| CLCC1         | 5 | 1 | 0.956349206 | 0.003604904 |
| TTC28-AS1     | 5 | 1 | 0.793650794 | 0.003606735 |
| IGFBP2        | 5 | 1 | 0.869047619 | 0.003609267 |
| C7orf10       | 5 | 1 | 0.910714286 | 0.003610112 |
| RPL36         | 5 | 1 | 0.926587302 | 0.003611429 |
| SLC7A11       | 5 | 1 | 0.853174603 | 0.003645043 |
| SAP18         | 5 | 1 | 0.865079365 | 0.003645592 |
| RDH16         | 5 | 1 | 0.886904762 | 0.003649236 |
| EGFLAM-AS4    | 5 | 1 | 0.890873016 | 0.003657851 |
| SBF2          | 5 | 1 | 0.755952381 | 0.003659079 |
| CENPK         | 5 | 1 | 0.742063492 | 0.003691122 |
| RP13-317D12.3 | 5 | 1 | 0.922619048 | 0.003746817 |
| ZNF397        | 5 | 1 | 0.904761905 | 0.003747916 |
| SIGLEC11      | 5 | 1 | 0.908730159 | 0.003766576 |
| DRAXIN        | 5 | 1 | 0.831349206 | 0.003779941 |
| MFSD11        | 5 | 1 | 0.823412698 | 0.003781059 |
| AP000708.1    | 5 | 1 | 0.831349206 | 0.003788522 |
| GTPBP1        | 5 | 1 | 0.706349206 | 0.003802926 |
| ARL6IP1       | 5 | 1 | 0.781746032 | 0.003810091 |
| CCDC104       | 5 | 1 | 0.936507937 | 0.003820439 |
| AC217770.1    | 5 | 1 | 0.740079365 | 0.00382451  |
| ICOSLG        | 5 | 1 | 0.900793651 | 0.003853913 |
| TMEM41B       | 5 | 1 | 0.799603175 | 0.003872135 |
| AC005831.1    | 5 | 1 | 0.964285714 | 0.00389068  |
| CRYBB2P1      | 5 | 1 | 0.83531746  | 0.003918146 |
| CENPL         | 5 | 1 | 0.89484127  | 0.003943385 |
| SYCP3         | 5 | 1 | 0.833333333 | 0.003943385 |
| AICDA         | 5 | 1 | 1           | 0.003991727 |
| ZNF280B       | 5 | 1 | 0.976190476 | 0.004039011 |
| RP11-390F4.3  | 5 | 1 | 0.867063492 | 0.004099462 |
| ARSD          | 5 | 1 | 0.841269841 | 0.004107689 |
| LCTL          | 5 | 1 | 0.878968254 | 0.004174655 |

|               |   |   |             |             |
|---------------|---|---|-------------|-------------|
| RP11-122G18.5 | 5 | 1 | 0.952380952 | 0.004204758 |
| CCR4          | 5 | 1 | 0.962301587 | 0.004229811 |
| AP001597.1    | 5 | 1 | 0.775793651 | 0.004265731 |
| NDRG1         | 5 | 1 | 0.857142857 | 0.004326213 |
| WDR45         | 5 | 1 | 0.765873016 | 0.004344738 |
| RP11-273G15.2 | 5 | 1 | 0.813492063 | 0.004347101 |
| SEC22C        | 5 | 1 | 0.751984127 | 0.004360351 |
| ARMCX4        | 5 | 1 | 0.94047619  | 0.004360385 |
| C14orf105     | 5 | 1 | 0.976190476 | 0.004386208 |
| PTCD1         | 5 | 1 | 0.936507937 | 0.004387258 |
| GPR157        | 5 | 1 | 0.948412698 | 0.004443973 |
| HYOU1         | 5 | 1 | 0.825396825 | 0.004472974 |
| AP003068.18   | 5 | 1 | 0.96031746  | 0.00447358  |
| ZNF19         | 5 | 1 | 0.819444444 | 0.004475801 |
| RABGAP1L      | 5 | 1 | 0.946428571 | 0.004495947 |
| GP2           | 5 | 1 | 0.922619048 | 0.004590015 |
| DNAH14        | 5 | 1 | 0.83531746  | 0.004593553 |
| LILRB4        | 5 | 1 | 0.746031746 | 0.004623572 |
| PPIL6         | 5 | 1 | 0.972222222 | 0.004635827 |
| WNT9B         | 5 | 1 | 0.847222222 | 0.004666909 |
| RPS6KB2       | 5 | 1 | 0.823412698 | 0.004715751 |
| AC111200.2    | 5 | 1 | 0.843253968 | 0.004770689 |
| ACTR3         | 5 | 1 | 0.700396825 | 0.004782968 |
| KDM2A         | 5 | 1 | 0.861111111 | 0.004792975 |
| MORN1         | 5 | 1 | 0.950396825 | 0.004795083 |
| KCNE4         | 5 | 1 | 0.922619048 | 0.004817857 |
| ACTR10        | 5 | 1 | 0.857142857 | 0.004900828 |
| SF3B2         | 5 | 1 | 0.916666667 | 0.004946344 |
| E2F5          | 5 | 1 | 0.813492063 | 0.004955877 |
| C21orf58      | 5 | 1 | 0.873015873 | 0.00497027  |
| SSR2          | 5 | 1 | 0.73015873  | 0.005006032 |
| RP11-536C10.3 | 5 | 1 | 0.992063492 | 0.005032417 |
| PHTF1         | 5 | 1 | 0.884920635 | 0.005047122 |
| CTD-3203P2.2  | 5 | 1 | 0.805555556 | 0.005088986 |

|            |   |   |             |             |
|------------|---|---|-------------|-------------|
| MZT2B      | 5 | 1 | 0.938492063 | 0.005107035 |
| TNFAIP8L3  | 5 | 1 | 0.920634921 | 0.005125653 |
| SLC25A5    | 5 | 1 | 0.805555556 | 0.005155052 |
| PIGR       | 5 | 1 | 0.89484127  | 0.005196627 |
| ZNF461     | 5 | 1 | 0.849206349 | 0.005200532 |
| LBR        | 5 | 1 | 0.972222222 | 0.005278864 |
| ADAM12     | 5 | 1 | 0.93452381  | 0.005279003 |
| DACT3      | 5 | 1 | 0.748015873 | 0.005282106 |
| NNT        | 5 | 1 | 0.724206349 | 0.005296379 |
| FAM131A    | 5 | 1 | 0.970238095 | 0.005330778 |
| MPHOSPH8   | 5 | 1 | 0.912698413 | 0.005341558 |
| TMEM8A     | 5 | 1 | 0.908730159 | 0.005348263 |
| TRIM45     | 5 | 1 | 0.902777778 | 0.005363448 |
| AL356475.1 | 5 | 1 | 0.910714286 | 0.005368357 |
| SRGAP3     | 5 | 1 | 0.845238095 | 0.005389137 |
| FBXO42     | 5 | 1 | 0.916666667 | 0.005429421 |
| PTGIS      | 5 | 1 | 0.857142857 | 0.005436918 |
| PTTG1      | 5 | 1 | 0.751984127 | 0.005544492 |
| CIT        | 5 | 1 | 0.83531746  | 0.005549274 |
| CTNNA1     | 5 | 1 | 0.746031746 | 0.005590422 |
| INIP       | 5 | 1 | 0.819444444 | 0.005599542 |
| PXN        | 5 | 1 | 0.785714286 | 0.005607197 |
| TPX2       | 5 | 1 | 0.825396825 | 0.005607667 |
| VDAC1      | 5 | 1 | 0.849206349 | 0.00570578  |
| TAB3       | 5 | 1 | 0.888888889 | 0.005708613 |
| HERC1      | 5 | 1 | 0.75        | 0.005718665 |
| NFKBIB     | 5 | 1 | 0.845238095 | 0.005804545 |
| AC225613.6 | 5 | 1 | 0.867063492 | 0.005808466 |
| UBR5       | 5 | 1 | 0.807539683 | 0.005815986 |
| COQ5       | 5 | 1 | 0.920634921 | 0.005835534 |
| MTL5       | 5 | 1 | 0.781746032 | 0.005854138 |
| CEP44      | 5 | 1 | 0.819444444 | 0.005908673 |
| COPB2      | 5 | 1 | 0.880952381 | 0.005916081 |
| HFE        | 5 | 1 | 0.849206349 | 0.005932513 |

|               |   |   |             |             |
|---------------|---|---|-------------|-------------|
| RP11-428G5.7  | 5 | 1 | 0.811507937 | 0.005944187 |
| MYOF          | 5 | 1 | 0.867063492 | 0.00594546  |
| ATP5S         | 5 | 1 | 0.813492063 | 0.006019256 |
| POLB          | 5 | 1 | 0.748015873 | 0.006019256 |
| COL8A1        | 5 | 1 | 0.926587302 | 0.006034724 |
| PCDH11X       | 5 | 1 | 0.823412698 | 0.006035023 |
| AC074117.10   | 5 | 1 | 0.958333333 | 0.006075811 |
| PALM2         | 5 | 1 | 0.795634921 | 0.006075811 |
| RP11-43F13.3  | 5 | 1 | 0.936507937 | 0.006106321 |
| ZFYVE26       | 5 | 1 | 0.896825397 | 0.006114615 |
| RP11-415I12.3 | 5 | 1 | 0.936507937 | 0.006153363 |
| KIAA1324      | 5 | 1 | 0.793650794 | 0.006206927 |
| C14orf119     | 5 | 1 | 0.700396825 | 0.006207193 |
| TACC2         | 5 | 1 | 0.908730159 | 0.006241727 |
| MRPS18C       | 5 | 1 | 0.839285714 | 0.00624221  |
| SCFD1         | 5 | 1 | 0.78968254  | 0.006261837 |
| GPR141        | 5 | 1 | 0.831349206 | 0.006268629 |
| RP11-338E21.3 | 5 | 1 | 0.867063492 | 0.006278382 |
| TP53RK        | 5 | 1 | 0.89484127  | 0.006283058 |
| GOLGA2B       | 5 | 1 | 0.777777778 | 0.006289675 |
| S100A10       | 5 | 1 | 0.896825397 | 0.006310403 |
| POLR1A        | 5 | 1 | 0.908730159 | 0.006336906 |
| RP11-418J17.1 | 5 | 1 | 0.751984127 | 0.006375074 |
| FAM47E        | 5 | 1 | 0.920634921 | 0.006390688 |
| SEC24B        | 5 | 1 | 0.928571429 | 0.006420857 |
| ZNF483        | 5 | 1 | 0.819444444 | 0.006426054 |
| DHRS2         | 5 | 1 | 0.795634921 | 0.006438907 |
| RAB2B         | 5 | 1 | 0.813492063 | 0.006468948 |
| IL21R         | 5 | 1 | 0.892857143 | 0.00650671  |
| ZNF527        | 5 | 1 | 0.863095238 | 0.006510758 |
| CREG2         | 5 | 1 | 0.946428571 | 0.006521714 |
| EFCAB11       | 5 | 1 | 0.892857143 | 0.006553584 |
| OTX2-AS1      | 5 | 1 | 0.930555556 | 0.006553617 |
| NOS3          | 5 | 1 | 0.984126984 | 0.006616192 |

|               |   |             |             |             |
|---------------|---|-------------|-------------|-------------|
| MSH6          | 5 | 1           | 0.78968254  | 0.006653253 |
| LINC00476     | 5 | 1           | 0.85515873  | 0.006709436 |
| CLSPN         | 5 | 1           | 0.712301587 | 0.006716035 |
| HEATR5A       | 5 | 1           | 0.718253968 | 0.006786167 |
| LMOD3         | 5 | 1           | 0.996031746 | 0.006802294 |
| RP4-765C7.1   | 5 | 1           | 0.85515873  | 0.006815628 |
| H3F3A         | 5 | 1           | 0.78968254  | 0.006816955 |
| DFFA          | 5 | 1           | 0.902777778 | 0.006834209 |
| ZNF620        | 5 | 1           | 0.761904762 | 0.006866238 |
| NELFCD        | 5 | 1           | 0.775793651 | 0.006901197 |
| BX284927.1    | 5 | 0.002362765 | 0.996031746 | 0.006904494 |
| SPCS2         | 5 | 1           | 0.787698413 | 0.00696001  |
| SRGAP1        | 5 | 1           | 0.96031746  | 0.006963807 |
| MAPK3         | 5 | 1           | 0.902777778 | 0.006983326 |
| PLA2G12A      | 5 | 1           | 0.746031746 | 0.007026481 |
| ALS2          | 5 | 1           | 0.759920635 | 0.007038981 |
| TRIM73        | 5 | 1           | 0.988095238 | 0.007045573 |
| DDX46         | 5 | 1           | 0.734126984 | 0.007159539 |
| ARHGAP22      | 5 | 1           | 0.976190476 | 0.007195107 |
| STPG1         | 5 | 1           | 0.944444444 | 0.007202545 |
| PTPN14        | 5 | 1           | 0.882936508 | 0.007254727 |
| CCL22         | 5 | 1           | 0.797619048 | 0.007294936 |
| ABRACL        | 5 | 1           | 0.68452381  | 0.007304834 |
| GINS1         | 5 | 1           | 0.910714286 | 0.007319561 |
| ZNF468        | 5 | 1           | 0.78968254  | 0.007320371 |
| TYMP          | 5 | 1           | 0.928571429 | 0.007354343 |
| HOMER2        | 5 | 1           | 0.853174603 | 0.00736893  |
| ST6GAL2       | 5 | 1           | 0.978174603 | 0.007516274 |
| TMPO          | 5 | 1           | 0.932539683 | 0.007516274 |
| GPR19         | 5 | 1           | 0.797619048 | 0.007519744 |
| FABP2         | 5 | 1           | 0.96031746  | 0.007580062 |
| TPR           | 5 | 1           | 0.704365079 | 0.007620044 |
| RP11-521B24.3 | 5 | 1           | 0.793650794 | 0.00764878  |
| CYCS          | 5 | 1           | 0.759920635 | 0.007726281 |

|               |   |   |             |             |
|---------------|---|---|-------------|-------------|
| EMP3          | 5 | 1 | 0.724206349 | 0.007728382 |
| RAB13         | 5 | 1 | 0.948412698 | 0.007741538 |
| CCDC141       | 5 | 1 | 0.96031746  | 0.007788428 |
| TJAP1         | 5 | 1 | 0.761904762 | 0.007809753 |
| BSN-AS2       | 5 | 1 | 0.83531746  | 0.007835418 |
| CHAF1B        | 5 | 1 | 0.884920635 | 0.00784561  |
| SLC35F6       | 5 | 1 | 0.908730159 | 0.007863225 |
| LHFPL5        | 5 | 1 | 0.678571429 | 0.007874271 |
| ZNF563        | 5 | 1 | 0.91468254  | 0.007886038 |
| CLEC2D        | 5 | 1 | 0.80952381  | 0.007905115 |
| ZNF331        | 5 | 1 | 0.823412698 | 0.007943915 |
| ZNF555        | 5 | 1 | 0.888888889 | 0.007968074 |
| RP11-64D24.4  | 5 | 1 | 0.94047619  | 0.007995768 |
| TRMT10B       | 5 | 1 | 0.801587302 | 0.00805724  |
| TAGLN2        | 5 | 1 | 0.968253968 | 0.008081492 |
| CEP152        | 5 | 1 | 0.880952381 | 0.008086694 |
| RBM3          | 5 | 1 | 0.696428571 | 0.008178679 |
| PAQR5         | 5 | 1 | 0.880952381 | 0.008193039 |
| CYBRD1        | 5 | 1 | 0.763888889 | 0.008225571 |
| RAB3IP        | 5 | 1 | 0.777777778 | 0.00829131  |
| AC004166.7    | 5 | 1 | 0.753968254 | 0.008331351 |
| RP11-362F19.2 | 5 | 1 | 0.851190476 | 0.008365193 |
| KLF9          | 5 | 1 | 0.781746032 | 0.008408493 |
| GGA1          | 5 | 1 | 0.819444444 | 0.008462656 |
| AKR1D1        | 5 | 1 | 0.956349206 | 0.008463525 |
| POLE2         | 5 | 1 | 0.734126984 | 0.008467094 |
| AL356356.1    | 5 | 1 | 0.716269841 | 0.008525288 |
| UQCRQ         | 5 | 1 | 0.81547619  | 0.008790228 |
| ACAD10        | 5 | 1 | 0.75        | 0.0087933   |
| PCBD2         | 5 | 1 | 0.801587302 | 0.008853759 |
| TRIM59        | 5 | 1 | 0.861111111 | 0.008864787 |
| PRKAR2A-AS1   | 5 | 1 | 0.775793651 | 0.00887907  |
| FAM111B       | 5 | 1 | 0.861111111 | 0.008880938 |
| TXNRD2        | 5 | 1 | 0.875       | 0.008904129 |

|           |   |             |             |             |
|-----------|---|-------------|-------------|-------------|
| PARP4     | 5 | 1           | 0.71031746  | 0.008957571 |
| DENR      | 5 | 1           | 0.886904762 | 0.008974057 |
| MR1       | 5 | 1           | 0.744047619 | 0.009017153 |
| NUP210    | 5 | 1           | 0.71031746  | 0.009026906 |
| FAM179B   | 5 | 1           | 0.944444444 | 0.009057143 |
| DHX30     | 5 | 1           | 0.880952381 | 0.00912203  |
| KANK1     | 5 | 1           | 0.753968254 | 0.009154695 |
| LYRM7     | 5 | 1           | 0.888888889 | 0.009167774 |
| MRE11A    | 5 | 1           | 0.712301587 | 0.009222845 |
| DOPEY2    | 5 | 1           | 0.884920635 | 0.009267818 |
| SNX15     | 5 | 1           | 0.807539683 | 0.009353536 |
| ATP8B2    | 5 | 1           | 0.746031746 | 0.009390163 |
| NEK8      | 5 | 1           | 0.926587302 | 0.009420456 |
| DIABLO    | 5 | 1           | 0.886904762 | 0.009440477 |
| DCX       | 5 | 1           | 0.96031746  | 0.009474804 |
| CRTC3     | 5 | 1           | 0.783730159 | 0.009492855 |
| C7orf41   | 5 | 1           | 0.793650794 | 0.009525793 |
| TBC1D10A  | 5 | 1           | 0.912698413 | 0.009585596 |
| FAM76A    | 5 | 1           | 0.853174603 | 0.009643125 |
| UHRF1BP1L | 5 | 1           | 0.813492063 | 0.009669191 |
| PTPN7     | 5 | 1           | 0.791666667 | 0.009688616 |
| RPS11     | 5 | 1           | 0.861111111 | 0.009712272 |
| WWC3      | 5 | 1           | 0.859126984 | 0.009715343 |
| RAD21-AS1 | 5 | 1           | 0.829365079 | 0.00978293  |
| IBA57     | 5 | 1           | 0.880952381 | 0.009828932 |
| WDR65     | 5 | 0.346334804 | 0.998015873 | 0.009902434 |
| LMX1B     | 5 | 1           | 0.880952381 | 0.009992888 |
| NARG2     | 5 | 1           | 0.765873016 | 0.00999404  |
| BSPRY     | 5 | 1           | 0.851190476 | 0.010080047 |
| CHMP1B    | 5 | 1           | 0.783730159 | 0.010089445 |
| RRAGC     | 5 | 1           | 0.888888889 | 0.010229636 |
| EFCAB5    | 5 | 1           | 0.841269841 | 0.010243598 |
| C4orf26   | 5 | 1           | 0.952380952 | 0.010298195 |
| RPUSD4    | 5 | 1           | 0.871031746 | 0.010299607 |



|              |   |   |             |             |
|--------------|---|---|-------------|-------------|
| COX18        | 5 | 1 | 0.823412698 | 0.010324954 |
| TMEM213      | 5 | 1 | 0.91468254  | 0.010366325 |
| SNTB2        | 5 | 1 | 0.964285714 | 0.010376219 |
| ATG10        | 5 | 1 | 0.793650794 | 0.010391233 |
| RP4-669B10.3 | 5 | 1 | 0.942460317 | 0.010410933 |
| ATAD5        | 5 | 1 | 0.728174603 | 0.010411975 |
| PRMT10       | 5 | 1 | 0.884920635 | 0.010423221 |
| VPS35        | 5 | 1 | 0.863095238 | 0.010436551 |
| PLD3         | 5 | 1 | 0.884920635 | 0.010441617 |
| SRSF10       | 5 | 1 | 0.811507937 | 0.010517869 |
| TRNT1        | 5 | 1 | 0.861111111 | 0.010528708 |
| FGFR2        | 5 | 1 | 0.968253968 | 0.01062196  |
| XIAP-AS1     | 5 | 1 | 0.932539683 | 0.010650865 |
| CD163        | 5 | 1 | 0.984126984 | 0.010689518 |
| U2SURP       | 5 | 1 | 0.68452381  | 0.01069733  |
| KANSL3       | 5 | 1 | 0.876984127 | 0.010743373 |
| SIDT2        | 5 | 1 | 0.761904762 | 0.010814315 |
| TRIM66       | 5 | 1 | 0.930555556 | 0.010826927 |
| RP11-51J9.4  | 5 | 1 | 0.880952381 | 0.010838186 |
| RHBDL2       | 5 | 1 | 0.928571429 | 0.010876432 |
| CCT6A        | 5 | 1 | 0.791666667 | 0.010945534 |
| FAM65B       | 5 | 1 | 0.825396825 | 0.010987909 |
| C11orf92     | 5 | 1 | 0.908730159 | 0.011016491 |
| BX247900.3   | 5 | 1 | 0.954365079 | 0.011090762 |
| GPR155       | 5 | 1 | 0.819444444 | 0.011143337 |
| SQSTM1       | 5 | 1 | 0.904761905 | 0.011191836 |
| MTHFD1       | 5 | 1 | 0.73015873  | 0.011220477 |
| POLR3K       | 5 | 1 | 0.793650794 | 0.011249465 |
| CHEK1        | 5 | 1 | 0.755952381 | 0.011380287 |
| SNRNP35      | 5 | 1 | 0.80952381  | 0.01138515  |
| LAMC2        | 5 | 1 | 0.753968254 | 0.011451392 |
| SNRPG        | 5 | 1 | 0.708333333 | 0.011507782 |
| NEBL         | 5 | 1 | 0.996031746 | 0.01152592  |
| ZNF561       | 5 | 1 | 0.924603175 | 0.011570586 |

|               |   |             |             |             |
|---------------|---|-------------|-------------|-------------|
| AC108676.1    | 5 | 1           | 0.976190476 | 0.011792384 |
| MRPS28        | 5 | 1           | 0.740079365 | 0.011800359 |
| RP11-544A12.8 | 5 | 1           | 0.954365079 | 0.01182902  |
| HAUS3         | 5 | 1           | 0.807539683 | 0.011836182 |
| RP11-727A23.4 | 5 | 1           | 0.930555556 | 0.01188443  |
| SNRPB         | 5 | 1           | 0.748015873 | 0.011944538 |
| KIAA1841      | 5 | 1           | 0.831349206 | 0.011949047 |
| CCDC108       | 5 | 0.001577796 | 0.98015873  | 0.012009927 |
| HTR7P1        | 5 | 1           | 0.880952381 | 0.012025446 |
| RP11-231P20.2 | 5 | 1           | 0.904761905 | 0.012027294 |
| TMEM245       | 5 | 1           | 0.765873016 | 0.012038057 |
| RP11-354E11.2 | 5 | 1           | 0.98015873  | 0.012054814 |
| TAF9          | 5 | 1           | 0.98015873  | 0.012149981 |
| PAAF1         | 5 | 1           | 0.833333333 | 0.012226425 |
| HMGCL         | 5 | 1           | 0.924603175 | 0.012236478 |
| ING5          | 5 | 1           | 0.841269841 | 0.01226067  |
| TUBA1C        | 5 | 1           | 0.795634921 | 0.012319124 |
| KIF14         | 5 | 1           | 0.892857143 | 0.012319996 |
| RP11-12A16.3  | 5 | 1           | 0.759920635 | 0.012371851 |
| RP11-125N22.2 | 5 | 0.110666739 | 0.988095238 | 0.012454534 |
| C3orf72       | 5 | 1           | 0.98015873  | 0.012482526 |
| MSI2          | 5 | 1           | 0.83531746  | 0.012495043 |
| CLIC1         | 5 | 1           | 0.932539683 | 0.012510551 |
| HAUS2         | 5 | 1           | 0.80952381  | 0.012543206 |
| ADAMTS16      | 5 | 1           | 0.765873016 | 0.012587717 |
| STK33         | 5 | 1           | 0.976190476 | 0.012599086 |
| RP11-411K7.1  | 5 | 1           | 0.843253968 | 0.012717056 |
| USP32P1       | 5 | 1           | 0.83531746  | 0.01284035  |
| RASGRP3       | 5 | 1           | 0.886904762 | 0.012874102 |
| RP11-219E24.1 | 5 | 1           | 0.878968254 | 0.012912939 |
| ISG20L2       | 5 | 1           | 0.928571429 | 0.012960659 |
| PIP5K1B       | 5 | 1           | 0.950396825 | 0.013003202 |
| GS1-122H1.2   | 5 | 1           | 0.978174603 | 0.013062901 |
| FLCN          | 5 | 1           | 0.94047619  | 0.013069495 |

|               |   |             |             |             |
|---------------|---|-------------|-------------|-------------|
| RP11-169O17.5 | 5 | 1           | 0.797619048 | 0.013076072 |
| CDK1          | 5 | 1           | 0.869047619 | 0.013132043 |
| PTPRVP        | 5 | 1           | 0.988095238 | 0.013155795 |
| C4orf36       | 5 | 1           | 0.817460317 | 0.013188555 |
| FRMD4B        | 5 | 1           | 1           | 0.013193415 |
| NUDT9         | 5 | 1           | 0.837301587 | 0.013193415 |
| RASSF8        | 5 | 1           | 0.886904762 | 0.013201187 |
| FKBP14        | 5 | 1           | 0.821428571 | 0.0132084   |
| DNAH3         | 5 | 0.503453986 | 0.976190476 | 0.013223794 |
| AC009951.2    | 5 | 1           | 0.795634921 | 0.013239745 |
| PANK3         | 5 | 1           | 0.734126984 | 0.013443018 |
| STARD4        | 5 | 1           | 0.83531746  | 0.01356295  |
| VGLL4         | 5 | 1           | 0.823412698 | 0.013596497 |
| TXN           | 5 | 1           | 0.773809524 | 0.013706235 |
| ALDH6A1       | 5 | 1           | 0.928571429 | 0.013716206 |
| ARL6IP5       | 5 | 1           | 0.900793651 | 0.013742343 |
| ALPK1         | 5 | 1           | 0.83531746  | 0.01377912  |
| NDFIP1        | 5 | 1           | 0.801587302 | 0.013835976 |
| C4orf21       | 5 | 1           | 0.80952381  | 0.013889773 |
| TTPAL         | 5 | 1           | 0.952380952 | 0.013891622 |
| CD46          | 5 | 1           | 0.944444444 | 0.013944656 |
| FAM200B       | 5 | 1           | 0.918650794 | 0.013991553 |
| ZNF28         | 5 | 1           | 0.906746032 | 0.014058853 |
| C9orf85       | 5 | 1           | 0.795634921 | 0.014069257 |
| CDKAL1        | 5 | 1           | 0.83531746  | 0.014082528 |
| SNHG16        | 5 | 1           | 0.948412698 | 0.014278151 |
| PLAC8         | 5 | 1           | 0.742063492 | 0.0143206   |
| C11orf73      | 5 | 1           | 0.765873016 | 0.014391968 |
| GATAD1        | 5 | 1           | 0.761904762 | 0.014417465 |
| RP11-409I10.2 | 5 | 1           | 0.898809524 | 0.014445363 |
| ZNF823        | 5 | 1           | 0.843253968 | 0.014451746 |
| MFN1          | 5 | 1           | 0.922619048 | 0.014505535 |
| MYT1L         | 5 | 1           | 0.942460317 | 0.014519459 |
| MZT2A         | 5 | 1           | 0.831349206 | 0.014664926 |

|               |   |             |             |             |
|---------------|---|-------------|-------------|-------------|
| GBA           | 5 | 1           | 0.871031746 | 0.014727852 |
| OSGEP         | 5 | 1           | 0.773809524 | 0.014770314 |
| PPP1R37       | 5 | 1           | 0.831349206 | 0.014775057 |
| RP11-486O13.2 | 5 | 1           | 0.916666667 | 0.014789053 |
| CFP           | 5 | 1           | 0.847222222 | 0.014904648 |
| PTDSS2        | 5 | 1           | 0.791666667 | 0.014955924 |
| TRPM8         | 5 | 1           | 0.791666667 | 0.015055073 |
| GPRIN2        | 5 | 1           | 0.942460317 | 0.015059329 |
| DTX3L         | 5 | 1           | 0.78968254  | 0.015125813 |
| AL353662.2    | 5 | 1           | 0.869047619 | 0.015158271 |
| ADI1          | 5 | 1           | 0.876984127 | 0.01517757  |
| TARS2         | 5 | 1           | 0.908730159 | 0.015248244 |
| RP11-325N19.3 | 5 | 1           | 0.936507937 | 0.015303768 |
| FGFR1         | 5 | 1           | 0.936507937 | 0.015327735 |
| EEF2K         | 5 | 1           | 0.825396825 | 0.015528197 |
| BMS1P5        | 5 | 1           | 0.886904762 | 0.015610362 |
| DTX2          | 5 | 1           | 0.833333333 | 0.015673426 |
| MPST          | 5 | 1           | 0.884920635 | 0.01569477  |
| PIWIL2        | 5 | 1           | 0.867063492 | 0.015743692 |
| SYNE3         | 5 | 1           | 0.728174603 | 0.015882322 |
| STEAP2        | 5 | 1           | 0.906746032 | 0.016012143 |
| GDPD5         | 5 | 1           | 0.952380952 | 0.016061586 |
| RBM19         | 5 | 1           | 0.829365079 | 0.01607466  |
| ZNF417        | 5 | 1           | 0.845238095 | 0.016165463 |
| DGKB          | 5 | 1           | 0.920634921 | 0.016335961 |
| DIEXF         | 5 | 1           | 0.93452381  | 0.016385839 |
| AC024560.3    | 5 | 1           | 0.847222222 | 0.016408521 |
| LEPR          | 5 | 1           | 0.892857143 | 0.016416573 |
| PCMTD1P3      | 5 | 0.169795881 | 0.978174603 | 0.016444047 |
| RP11-519G16.3 | 5 | 1           | 0.771825397 | 0.016447385 |
| STMND1        | 5 | 1           | 0.785714286 | 0.016475941 |
| THG1L         | 5 | 1           | 0.849206349 | 0.016542698 |
| DECR1         | 5 | 1           | 0.869047619 | 0.01671526  |
| ACTR1A        | 5 | 1           | 0.851190476 | 0.016756106 |

|               |   |             |             |             |
|---------------|---|-------------|-------------|-------------|
| VRK2          | 5 | 1           | 0.763888889 | 0.016852932 |
| FUT10         | 5 | 1           | 0.742063492 | 0.016955417 |
| ZNF286B       | 5 | 1           | 0.962301587 | 0.017013891 |
| SLC6A6        | 5 | 1           | 0.78968254  | 0.017021805 |
| FAM149B1      | 5 | 1           | 0.76984127  | 0.017109791 |
| MPHOSPH9      | 5 | 1           | 0.954365079 | 0.017209344 |
| RP11-503N18.5 | 5 | 1           | 0.936507937 | 0.017212966 |
| BBS5          | 5 | 1           | 0.966269841 | 0.017286178 |
| CNOT6         | 5 | 1           | 0.783730159 | 0.017338586 |
| ZFYVE20       | 5 | 1           | 0.93452381  | 0.017479759 |
| FLVCR1        | 5 | 1           | 0.837301587 | 0.017514647 |
| RP11-10O22.1  | 5 | 1           | 0.876984127 | 0.01752036  |
| SFXN5         | 5 | 1           | 0.803571429 | 0.017570981 |
| CDK5RAP2      | 5 | 1           | 0.833333333 | 0.017714103 |
| RP11-453E17.1 | 5 | 1           | 0.908730159 | 0.017714103 |
| ANKS4B        | 5 | 1           | 0.880952381 | 0.017715917 |
| LCOR          | 5 | 1           | 0.722222222 | 0.017926186 |
| CD99P1        | 5 | 1           | 0.765873016 | 0.017952988 |
| ARFGEF2       | 5 | 1           | 0.767857143 | 0.018007234 |
| DSCR3         | 5 | 1           | 0.80952381  | 0.018057353 |
| EXOSC2        | 5 | 1           | 0.829365079 | 0.018064771 |
| CLIC5         | 5 | 0.000464468 | 1           | 0.01808642  |
| SCNM1         | 5 | 1           | 0.878968254 | 0.018130197 |
| SLC9A7        | 5 | 1           | 0.837301587 | 0.018256443 |
| PSMD9         | 5 | 1           | 0.781746032 | 0.018258098 |
| TTC26         | 5 | 1           | 0.736111111 | 0.018297968 |
| MGP           | 5 | 1           | 0.942460317 | 0.018368752 |
| CYP27C1       | 5 | 1           | 0.932539683 | 0.018399815 |
| RAB3B         | 5 | 1           | 0.924603175 | 0.01851752  |
| DOCK4         | 5 | 0.717575899 | 0.954365079 | 0.018550069 |
| NLRP12        | 5 | 1           | 0.876984127 | 0.018680568 |
| C15orf40      | 5 | 1           | 0.984126984 | 0.018755951 |
| SEC24D        | 5 | 1           | 0.871031746 | 0.018976273 |
| CYB5R2        | 5 | 1           | 0.892857143 | 0.019068569 |

|               |   |   |             |             |
|---------------|---|---|-------------|-------------|
| CTC-281B15.1  | 5 | 1 | 0.886904762 | 0.01909221  |
| RP11-18A3.4   | 5 | 1 | 0.928571429 | 0.019107596 |
| FGD4          | 5 | 1 | 0.831349206 | 0.01913299  |
| UPK1B         | 5 | 1 | 0.946428571 | 0.019169181 |
| MOGAT3        | 5 | 1 | 0.906746032 | 0.019219317 |
| C1orf115      | 5 | 1 | 0.734126984 | 0.019242815 |
| MAP3K1        | 5 | 1 | 0.839285714 | 0.019252181 |
| ERI1          | 5 | 1 | 0.765873016 | 0.019272987 |
| RANBP1        | 5 | 1 | 0.674603175 | 0.019272987 |
| RP11-87M18.2  | 5 | 1 | 0.912698413 | 0.019303791 |
| COQ4          | 5 | 1 | 0.932539683 | 0.019308645 |
| SLC28A2       | 5 | 1 | 0.910714286 | 0.01937839  |
| TUFT1         | 5 | 1 | 0.767857143 | 0.019378713 |
| KSR1          | 5 | 1 | 0.853174603 | 0.019383729 |
| MAP2K7        | 5 | 1 | 0.851190476 | 0.019390843 |
| NFU1          | 5 | 1 | 0.845238095 | 0.019393736 |
| MAN2B1        | 5 | 1 | 0.781746032 | 0.019470636 |
| STOM          | 5 | 1 | 0.740079365 | 0.019595302 |
| RP11-49I4.3   | 5 | 1 | 0.984126984 | 0.01961495  |
| NCOA1         | 5 | 1 | 0.924603175 | 0.019645457 |
| RP11-277A4.4  | 5 | 1 | 0.936507937 | 0.019657891 |
| WWC1          | 5 | 1 | 0.91468254  | 0.019661496 |
| ZNF844        | 5 | 1 | 0.863095238 | 0.019720953 |
| USP32P2       | 5 | 1 | 0.867063492 | 0.019749411 |
| RP11-139I14.2 | 5 | 1 | 0.944444444 | 0.019976723 |
| RP11-323J4.1  | 5 | 1 | 0.83531746  | 0.020005928 |
| FBXO5         | 5 | 1 | 0.936507937 | 0.020042071 |
| RIN2          | 5 | 1 | 0.880952381 | 0.02023657  |
| NOC2L         | 5 | 1 | 0.837301587 | 0.02050431  |
| AKNA          | 5 | 1 | 0.882936508 | 0.02067673  |
| PIGH          | 5 | 1 | 0.823412698 | 0.020731091 |
| DPF2          | 5 | 1 | 0.80952381  | 0.020744541 |
| MTERFD3       | 5 | 1 | 0.761904762 | 0.020922989 |
| SLC35F5       | 5 | 1 | 0.744047619 | 0.020994469 |

|               |   |             |             |             |
|---------------|---|-------------|-------------|-------------|
| TTLL7         | 5 | 1           | 0.871031746 | 0.02101887  |
| DDX39B-AS1    | 5 | 0.003564842 | 0.966269841 | 0.021028504 |
| LIN28A        | 5 | 1           | 0.93452381  | 0.021073904 |
| SYNE2         | 5 | 1           | 0.952380952 | 0.021073904 |
| KIF23         | 5 | 1           | 0.757936508 | 0.021136203 |
| RP11-301N24.3 | 5 | 0.991093459 | 0.968253968 | 0.021273236 |
| RP11-115C21.2 | 5 | 1           | 0.950396825 | 0.021311548 |
| UGT2B7        | 5 | 1           | 0.954365079 | 0.02131956  |
| PKN3          | 5 | 1           | 0.757936508 | 0.021333812 |
| PLXDC1        | 5 | 1           | 0.926587302 | 0.021546312 |
| KIAA0907      | 5 | 1           | 0.765873016 | 0.021719398 |
| ZNF284        | 5 | 1           | 0.857142857 | 0.021756736 |
| SH3BP5        | 5 | 1           | 0.96031746  | 0.021804497 |
| LAMA5         | 5 | 1           | 0.966269841 | 0.021840625 |
| HPS1          | 5 | 1           | 0.78968254  | 0.0219063   |
| C10orf11      | 5 | 1           | 0.797619048 | 0.022119474 |
| RNF115        | 5 | 1           | 0.781746032 | 0.022302119 |
| LARP4         | 5 | 1           | 0.799603175 | 0.02234824  |
| PPP2CA        | 5 | 1           | 0.799603175 | 0.022354352 |
| TNIP3         | 5 | 1           | 0.988095238 | 0.022607712 |
| MSANTD3       | 5 | 1           | 0.748015873 | 0.022680323 |
| RP11-169L17.3 | 5 | 1           | 0.926587302 | 0.022773707 |
| CNOT10        | 5 | 1           | 0.748015873 | 0.0228198   |
| DIS3L2        | 5 | 1           | 1           | 0.022868713 |
| SNAPC1        | 5 | 1           | 0.785714286 | 0.022976112 |
| CTTNBP2NL     | 5 | 1           | 0.948412698 | 0.023004808 |
| KLF2          | 5 | 1           | 0.912698413 | 0.023074375 |
| MCPH1         | 5 | 1           | 0.821428571 | 0.023174393 |
| ZSCAN4        | 5 | 1           | 0.751984127 | 0.023207661 |
| UBXN7         | 5 | 1           | 0.85515873  | 0.023233606 |
| SLAMF7        | 5 | 1           | 0.912698413 | 0.023285301 |
| IMPA2         | 5 | 1           | 0.938492063 | 0.023296161 |
| GTF2H2C       | 5 | 1           | 0.777777778 | 0.023306559 |
| UFD1L         | 5 | 1           | 0.948412698 | 0.023327195 |

|              |   |             |             |             |
|--------------|---|-------------|-------------|-------------|
| AKT2         | 5 | 1           | 0.801587302 | 0.023357672 |
| AC104667.3   | 5 | 1           | 1           | 0.02338554  |
| RAB21        | 5 | 1           | 0.785714286 | 0.02344858  |
| SMARCC1      | 5 | 1           | 0.793650794 | 0.023451585 |
| ZNF816       | 5 | 1           | 0.839285714 | 0.023463034 |
| APBB2        | 5 | 1           | 0.956349206 | 0.023555251 |
| GLYATL2      | 5 | 0.000591395 | 0.996031746 | 0.023719932 |
| PDLIM3       | 5 | 1           | 0.93452381  | 0.023906042 |
| GPI          | 5 | 1           | 0.751984127 | 0.02394771  |
| AC004019.13  | 5 | 1           | 0.865079365 | 0.024040523 |
| LINC00266-1  | 5 | 1           | 0.807539683 | 0.024055585 |
| C2CD2L       | 5 | 1           | 0.946428571 | 0.024065398 |
| CEP97        | 5 | 1           | 0.785714286 | 0.024096348 |
| CYB561D2     | 5 | 1           | 0.938492063 | 0.024148728 |
| DRAM1        | 5 | 1           | 0.771825397 | 0.024192503 |
| ABCG5        | 5 | 1           | 0.928571429 | 0.024310553 |
| C9orf38      | 5 | 1           | 0.787698413 | 0.024340589 |
| METTL7A      | 5 | 1           | 0.742063492 | 0.024352143 |
| CAPN7        | 5 | 1           | 0.865079365 | 0.024365126 |
| C6orf57      | 5 | 1           | 0.890873016 | 0.024518013 |
| RP11-382E9.1 | 5 | 1           | 0.833333333 | 0.024519067 |
| TMEM169      | 5 | 1           | 0.944444444 | 0.024519719 |
| ANKRD13D     | 5 | 1           | 0.841269841 | 0.024536398 |
| B3GALNT2     | 5 | 1           | 0.968253968 | 0.024606744 |
| ELAVL2       | 5 | 1           | 0.996031746 | 0.024710275 |
| SSBP1        | 5 | 1           | 0.666666667 | 0.024732893 |
| PIIP5K1      | 5 | 1           | 0.829365079 | 0.024734959 |
| GPRC5A       | 5 | 1           | 0.952380952 | 0.024798951 |
| ABCC4        | 5 | 1           | 0.843253968 | 0.024819265 |
| NUDT4        | 5 | 1           | 0.797619048 | 0.024819265 |
| CHORDC1      | 5 | 1           | 0.732142857 | 0.024831057 |
| BEST1        | 5 | 1           | 0.791666667 | 0.024853664 |
| CLU          | 5 | 1           | 0.976190476 | 0.024895169 |
| UGDH         | 5 | 1           | 0.880952381 | 0.024945498 |



|              |   |   |             |             |
|--------------|---|---|-------------|-------------|
| EXOC8        | 5 | 1 | 0.78968254  | 0.024959394 |
| AC092295.7   | 5 | 1 | 0.803571429 | 0.025006848 |
| UBE2V2       | 5 | 1 | 0.777777778 | 0.025043599 |
| ERC1         | 5 | 1 | 0.777777778 | 0.025046639 |
| SCN3B        | 5 | 1 | 0.740079365 | 0.025058916 |
| ADIPOQ-AS1   | 5 | 1 | 0.920634921 | 0.025118303 |
| TET1         | 5 | 1 | 0.744047619 | 0.025162121 |
| IFT81        | 5 | 1 | 0.912698413 | 0.025323454 |
| PCYOX1       | 5 | 1 | 0.956349206 | 0.025366213 |
| SLC2A1-AS1   | 5 | 1 | 0.867063492 | 0.02539835  |
| PFKM         | 5 | 1 | 0.976190476 | 0.02543161  |
| RP11-77K12.4 | 5 | 1 | 0.75        | 0.025433291 |
| NDUFV3       | 5 | 1 | 0.867063492 | 0.025469215 |
| RP1-102G20.5 | 5 | 1 | 0.968253968 | 0.025635865 |
| TLE3         | 5 | 1 | 0.799603175 | 0.025709623 |
| C8orf34      | 5 | 1 | 0.78968254  | 0.025826266 |
| SPCS3        | 5 | 1 | 0.740079365 | 0.026116411 |
| TRMT44       | 5 | 1 | 0.83531746  | 0.026165403 |
| AC004878.2   | 5 | 1 | 0.837301587 | 0.026491048 |
| C1orf86      | 5 | 1 | 0.839285714 | 0.026521552 |
| RMI1         | 5 | 1 | 0.73015873  | 0.026565344 |
| CHPT1        | 5 | 1 | 0.736111111 | 0.026673644 |
| NVL          | 5 | 1 | 0.888888889 | 0.026701049 |
| RP11-58E21.1 | 5 | 1 | 0.771825397 | 0.026773904 |
| C14orf2      | 5 | 1 | 0.805555556 | 0.026808193 |
| GPR112       | 5 | 1 | 0.984126984 | 0.026921336 |
| PRR19        | 5 | 1 | 0.91468254  | 0.026964752 |
| SWSAP1       | 5 | 1 | 0.962301587 | 0.026983594 |
| AC005152.2   | 5 | 1 | 0.75        | 0.027044515 |
| LRRK2        | 5 | 1 | 0.726190476 | 0.027227557 |
| MOBP         | 5 | 1 | 0.759920635 | 0.027414047 |
| CNTLN        | 5 | 1 | 0.75        | 0.027731215 |
| BCDIN3D-AS1  | 5 | 1 | 0.767857143 | 0.027809089 |
| GRM6         | 5 | 1 | 0.882936508 | 0.027813339 |

|              |   |             |             |             |
|--------------|---|-------------|-------------|-------------|
| AC003079.1   | 5 | 1           | 0.886904762 | 0.027972349 |
| CLEC2B       | 5 | 1           | 0.94047619  | 0.028031907 |
| ERAP1        | 5 | 1           | 0.912698413 | 0.028240069 |
| PDE4C        | 5 | 1           | 0.950396825 | 0.028300189 |
| PRR7-AS1     | 5 | 1           | 0.89484127  | 0.028316796 |
| PTP4A2       | 5 | 1           | 0.831349206 | 0.028429618 |
| PKD1         | 5 | 1           | 0.952380952 | 0.028538165 |
| KBTBD6       | 5 | 1           | 0.847222222 | 0.028670162 |
| IMMT         | 5 | 1           | 0.807539683 | 0.028748093 |
| HSD17B11     | 5 | 1           | 0.726190476 | 0.028764727 |
| RP5-886K2.1  | 5 | 1           | 0.968253968 | 0.028889231 |
| DHTKD1       | 5 | 1           | 0.757936508 | 0.028899117 |
| IL6ST        | 5 | 1           | 0.801587302 | 0.029021301 |
| C16orf62     | 5 | 1           | 0.823412698 | 0.029043229 |
| SKIL         | 5 | 1           | 0.863095238 | 0.029215812 |
| PRPF38A      | 5 | 1           | 0.827380952 | 0.029226851 |
| CPM          | 5 | 1           | 0.817460317 | 0.029539591 |
| VPS41        | 5 | 1           | 0.803571429 | 0.029588768 |
| TCIRG1       | 5 | 1           | 0.861111111 | 0.029591928 |
| RP11-561C5.3 | 5 | 1           | 0.886904762 | 0.029614917 |
| C10orf118    | 5 | 1           | 0.80952381  | 0.029651866 |
| CHMP3        | 5 | 1           | 0.787698413 | 0.029746596 |
| ZNF66        | 5 | 1           | 0.734126984 | 0.029816437 |
| SLC44A1      | 5 | 1           | 0.936507937 | 0.029909107 |
| CATSPERG     | 5 | 1           | 0.871031746 | 0.030144227 |
| RP5-881L22.4 | 5 | 0.128445195 | 0.954365079 | 0.030232405 |
| ABI2         | 5 | 1           | 0.821428571 | 0.030273023 |
| C3orf65      | 5 | 1           | 0.748015873 | 0.030450702 |
| ACTBP13      | 5 | 1           | 0.876984127 | 0.03064101  |
| CCZ1         | 5 | 1           | 0.829365079 | 0.030664956 |
| AGXT         | 5 | 1           | 0.80952381  | 0.030715021 |
| BANP         | 5 | 1           | 0.912698413 | 0.030715021 |
| GPR64        | 5 | 1           | 0.992063492 | 0.030764929 |
| BID          | 5 | 1           | 0.884920635 | 0.031003537 |

|               |   |             |             |             |
|---------------|---|-------------|-------------|-------------|
| C12orf43      | 5 | 1           | 0.871031746 | 0.031078913 |
| GLB1L         | 5 | 1           | 0.827380952 | 0.031169155 |
| BEND2         | 5 | 1           | 1           | 0.031285816 |
| AC104651.2    | 5 | 0.000762734 | 0.992063492 | 0.031433029 |
| RP11-244H18.4 | 5 | 1           | 0.797619048 | 0.031663859 |
| AC004941.3    | 5 | 1           | 0.882936508 | 0.031793238 |
| SEC14L5       | 5 | 1           | 0.880952381 | 0.031794838 |
| TTLL3         | 5 | 1           | 0.827380952 | 0.032074999 |
| NIPAL3        | 5 | 1           | 0.771825397 | 0.032103283 |
| AC055764.1    | 5 | 1           | 0.922619048 | 0.032127455 |
| HJURP         | 5 | 1           | 0.884920635 | 0.032138246 |
| MYO15A        | 5 | 1           | 0.771825397 | 0.032169185 |
| REEP3         | 5 | 1           | 0.817460317 | 0.032465273 |
| COX17         | 5 | 1           | 0.988095238 | 0.032666155 |
| MYCBPAP       | 5 | 1           | 0.817460317 | 0.032760652 |
| MASTL         | 5 | 1           | 0.801587302 | 0.033170391 |
| PRELP         | 5 | 1           | 0.890873016 | 0.0331959   |
| ZNF827        | 5 | 1           | 0.714285714 | 0.033335784 |
| DHX57         | 5 | 1           | 0.81547619  | 0.033381213 |
| FES           | 5 | 1           | 0.839285714 | 0.033467016 |
| MS4A6A        | 5 | 1           | 0.825396825 | 0.033519761 |
| IKZF1         | 5 | 1           | 0.837301587 | 0.033611373 |
| DUXA          | 5 | 1           | 0.781746032 | 0.033685351 |
| CTAGE5        | 5 | 1           | 0.751984127 | 0.033934484 |
| BTBD7P1       | 5 | 1           | 0.93452381  | 0.03409804  |
| ZNF69         | 5 | 1           | 0.936507937 | 0.034109516 |
| C2orf54       | 5 | 1           | 0.992063492 | 0.034111759 |
| TIMM17A       | 5 | 1           | 0.819444444 | 0.034463098 |
| ZNF684        | 5 | 1           | 0.744047619 | 0.034465646 |
| AP4S1         | 5 | 1           | 0.865079365 | 0.034991482 |
| CALCOCO2      | 5 | 1           | 0.833333333 | 0.03532745  |
| PIGQ          | 5 | 1           | 0.918650794 | 0.035328914 |
| CAT           | 5 | 1           | 0.837301587 | 0.035335907 |
| ZFP14         | 5 | 1           | 0.787698413 | 0.035515734 |

|              |   |             |             |             |
|--------------|---|-------------|-------------|-------------|
| MALL         | 5 | 1           | 0.952380952 | 0.035771857 |
| CCT6P3       | 5 | 1           | 0.831349206 | 0.035809329 |
| TRIM72       | 5 | 1           | 0.900793651 | 0.036117819 |
| MAST3        | 5 | 1           | 0.791666667 | 0.036154844 |
| U73166.2     | 5 | 1           | 0.890873016 | 0.036391379 |
| ELP6         | 5 | 1           | 0.787698413 | 0.036651202 |
| PAPSS2       | 5 | 1           | 0.738095238 | 0.036713233 |
| TGFB1        | 5 | 1           | 0.948412698 | 0.036955178 |
| SPA17        | 5 | 1           | 0.96031746  | 0.036976647 |
| ZEB1         | 5 | 1           | 0.912698413 | 0.036976647 |
| RP11-680F8.1 | 5 | 0.001099376 | 0.986111111 | 0.036980842 |
| NAAA         | 5 | 1           | 0.819444444 | 0.037039473 |
| LUZP2        | 5 | 1           | 0.956349206 | 0.037050432 |
| NUDT22       | 5 | 1           | 0.831349206 | 0.037074842 |
| DBF4B        | 5 | 1           | 0.932539683 | 0.037118177 |
| KAT6A        | 5 | 1           | 0.807539683 | 0.037141821 |
| RP11-589M4.3 | 5 | 1           | 0.892857143 | 0.037398862 |
| RGS13        | 5 | 1           | 0.763888889 | 0.03745816  |
| BX005432.1   | 5 | 1           | 0.998015873 | 0.037495553 |
| BX908738.1   | 5 | 1           | 0.998015873 | 0.037495553 |
| CR753509.1   | 5 | 1           | 0.998015873 | 0.037495553 |
| CR933842.1   | 5 | 1           | 0.998015873 | 0.037495553 |
| CR936918.1   | 5 | 1           | 0.998015873 | 0.037495553 |
| SLC12A9      | 5 | 1           | 0.926587302 | 0.037529566 |
| RP11-576D8.4 | 5 | 1           | 0.966269841 | 0.0375786   |
| MTND4P30     | 5 | 1           | 0.829365079 | 0.03762136  |
| C8orf31      | 5 | 1           | 0.761904762 | 0.037622934 |
| ZNF277       | 5 | 1           | 0.803571429 | 0.037910588 |
| ZNF496       | 5 | 1           | 0.91468254  | 0.037953906 |
| PRSS23       | 5 | 1           | 0.920634921 | 0.038124807 |
| POU2AF1      | 5 | 1           | 0.976190476 | 0.038302736 |
| BRWD1-IT1    | 5 | 0.000520375 | 0.998015873 | 0.038518838 |
| PACSIN2      | 5 | 1           | 0.751984127 | 0.038632079 |
| DCBLD2       | 5 | 1           | 0.823412698 | 0.038868634 |

|               |   |             |             |             |
|---------------|---|-------------|-------------|-------------|
| GEN1          | 5 | 1           | 0.801587302 | 0.038904872 |
| MRPL48        | 5 | 1           | 0.763888889 | 0.038918752 |
| PRKCA         | 5 | 1           | 0.880952381 | 0.038934677 |
| NUTF2         | 5 | 1           | 0.78968254  | 0.038948087 |
| TRAPPC4       | 5 | 1           | 0.718253968 | 0.038962465 |
| APIP          | 5 | 1           | 0.71031746  | 0.039482642 |
| C1orf61       | 5 | 1           | 0.886904762 | 0.039499431 |
| UBA1          | 5 | 1           | 0.797619048 | 0.039613432 |
| CBWD7         | 5 | 1           | 0.738095238 | 0.039647614 |
| ZMYM6         | 5 | 1           | 0.757936508 | 0.039929275 |
| RP11-554D14.6 | 5 | 1           | 0.924603175 | 0.040063463 |
| CTCFL         | 5 | 1           | 0.988095238 | 0.040135224 |
| VHL           | 5 | 1           | 0.825396825 | 0.04029815  |
| PVT1          | 5 | 1           | 0.712301587 | 0.040466082 |
| AP001187.1    | 5 | 1           | 0.819444444 | 0.040625028 |
| AKT3          | 5 | 1           | 0.986111111 | 0.040792274 |
| PDE4DIP       | 5 | 1           | 0.94047619  | 0.040792274 |
| ASCC2         | 5 | 1           | 0.863095238 | 0.040822081 |
| KLRK1         | 5 | 1           | 0.900793651 | 0.040850756 |
| CHN1          | 5 | 1           | 0.976190476 | 0.040865227 |
| SUPT20H       | 5 | 1           | 0.920634921 | 0.040865227 |
| MITD1         | 5 | 1           | 0.81547619  | 0.041052032 |
| AC010886.2    | 5 | 1           | 0.978174603 | 0.041073449 |
| ATP6V0D2      | 5 | 1           | 0.89484127  | 0.041138628 |
| FAM53B        | 5 | 1           | 0.918650794 | 0.041139697 |
| UQCRB         | 5 | 1           | 0.869047619 | 0.041169525 |
| PLEKHG3       | 5 | 1           | 0.757936508 | 0.041383954 |
| ATP5G2        | 5 | 1           | 0.708333333 | 0.041511247 |
| RP11-66N24.4  | 5 | 1           | 0.91468254  | 0.041518819 |
| FOXP1-AS1     | 5 | 1           | 0.740079365 | 0.041628178 |
| UBTFL3        | 5 | 0.576810548 | 0.972222222 | 0.041844877 |
| UBTFL5        | 5 | 0.576810548 | 0.972222222 | 0.041844877 |
| COL15A1       | 5 | 1           | 0.900793651 | 0.041984817 |
| DGCR5         | 5 | 1           | 0.714285714 | 0.042083107 |

|              |   |   |             |             |
|--------------|---|---|-------------|-------------|
| FBLIM1       | 5 | 1 | 0.851190476 | 0.042205612 |
| LAMA4        | 5 | 1 | 0.948412698 | 0.042362532 |
| PON3         | 5 | 1 | 0.998015873 | 0.042389907 |
| MPP6         | 5 | 1 | 0.736111111 | 0.042588987 |
| CHDH         | 5 | 1 | 0.882936508 | 0.042866975 |
| WISP2        | 5 | 1 | 0.869047619 | 0.042871583 |
| PLA2G4B      | 5 | 1 | 0.767857143 | 0.043082142 |
| VSIG10       | 5 | 1 | 0.646825397 | 0.043169675 |
| SLC4A8       | 5 | 1 | 0.775793651 | 0.043494194 |
| PSMD6-AS2    | 5 | 1 | 0.755952381 | 0.043575442 |
| POU5F1       | 5 | 1 | 0.952380952 | 0.043680134 |
| IL12RB1      | 5 | 1 | 0.821428571 | 0.043813259 |
| ABCB5        | 5 | 1 | 0.944444444 | 0.043951606 |
| MIR1255B1    | 5 | 1 | 0.821428571 | 0.044054415 |
| AC115618.1   | 5 | 1 | 0.781746032 | 0.044056574 |
| C9orf96      | 5 | 1 | 0.813492063 | 0.044172921 |
| AL662822.15  | 5 | 1 | 0.964285714 | 0.044269749 |
| AL844213.10  | 5 | 1 | 0.964285714 | 0.044269749 |
| CR762481.2   | 5 | 1 | 0.964285714 | 0.044269749 |
| POLR2A       | 5 | 1 | 0.801587302 | 0.044269749 |
| MKMK1        | 5 | 1 | 0.80952381  | 0.044547349 |
| NME6         | 5 | 1 | 0.904761905 | 0.04457039  |
| VMA21        | 5 | 1 | 0.753968254 | 0.044694795 |
| ACACA        | 5 | 1 | 0.922619048 | 0.044709693 |
| TMPRSS4      | 5 | 1 | 0.837301587 | 0.044763135 |
| AIM2         | 5 | 1 | 0.908730159 | 0.044977575 |
| WDR55        | 5 | 1 | 0.787698413 | 0.044985242 |
| KIF4A        | 5 | 1 | 0.817460317 | 0.045256118 |
| C16orf87     | 5 | 1 | 0.847222222 | 0.045329819 |
| CBX1         | 5 | 1 | 0.992063492 | 0.045386442 |
| RP11-74M13.4 | 5 | 1 | 0.910714286 | 0.045402028 |
| RP13-49I15.5 | 5 | 1 | 0.926587302 | 0.045402028 |
| TNRC18       | 5 | 1 | 0.80952381  | 0.045438614 |
| FNBP1P1      | 5 | 1 | 0.998015873 | 0.045587273 |

|              |   |             |             |             |
|--------------|---|-------------|-------------|-------------|
| ACAP3        | 5 | 1           | 0.781746032 | 0.045708709 |
| IQCE         | 5 | 1           | 0.712301587 | 0.045794507 |
| NCKAP5L      | 5 | 1           | 0.988095238 | 0.045832414 |
| CFLAR        | 5 | 1           | 0.726190476 | 0.045860361 |
| MAP4K4       | 5 | 1           | 0.904761905 | 0.045983199 |
| RP11-466F5.8 | 5 | 1           | 0.738095238 | 0.046181526 |
| LARP1        | 5 | 1           | 0.718253968 | 0.046331495 |
| RP11-632K5.5 | 5 | 1           | 0.920634921 | 0.046332485 |
| PARP11       | 5 | 1           | 0.740079365 | 0.046463723 |
| NOL8         | 5 | 1           | 0.916666667 | 0.046543099 |
| HECTD4       | 5 | 1           | 0.928571429 | 0.046551541 |
| ZNRF3-AS1    | 5 | 1           | 0.926587302 | 0.04691801  |
| RP11-19G24.2 | 5 | 0.015266843 | 1           | 0.047109216 |
| TERF1        | 5 | 1           | 0.906746032 | 0.047112487 |
| ZYG11B       | 5 | 1           | 0.831349206 | 0.047139776 |
| RP11-464F9.9 | 5 | 1           | 0.837301587 | 0.047143684 |
| EXTL3        | 5 | 1           | 0.857142857 | 0.04724011  |
| CDCA5        | 5 | 1           | 0.845238095 | 0.047528316 |
| P4HB         | 5 | 1           | 0.920634921 | 0.047647451 |
| MINOS1       | 5 | 1           | 0.787698413 | 0.047694593 |
| CPSF2        | 5 | 1           | 0.755952381 | 0.048021523 |
| SLC8A1-AS1   | 5 | 1           | 0.968253968 | 0.048476087 |
| SUMO2        | 5 | 1           | 0.670634921 | 0.048522395 |
| WBSCR22      | 5 | 1           | 0.757936508 | 0.048995576 |
| ZFYVE16      | 5 | 1           | 0.742063492 | 0.049012387 |
| PLEKHG2      | 5 | 1           | 0.78968254  | 0.049110744 |
| FEN1         | 5 | 1           | 0.787698413 | 0.049275054 |
| C15orf38     | 5 | 1           | 0.958333333 | 0.049326575 |
| RPUSD3       | 5 | 1           | 0.753968254 | 0.049459796 |
| PLCD3        | 5 | 1           | 0.845238095 | 0.049703663 |
| ARHGAP29     | 5 | 1           | 0.89484127  | 0.049781112 |
| PIGX         | 5 | 1           | 0.83531746  | 0.049984693 |
| YIPF6        |   |             |             | 0.020847556 |
